1 **Histo-molecular differentiation of renal cancer subtypes by mass**  
2 **spectrometry imaging and rapid proteome profiling of formalin-fixed**  
3 **paraffin-embedded tumor tissue sections**

4 Uwe Möginger<sup>1,§</sup>, Niels Marcussen<sup>2</sup>, Ole N. Jensen<sup>1\*</sup>

5 <sup>1</sup>Department of Biochemistry & Molecular Biology and VILLUM Center for Bioanalytical  
6 Sciences, University of Southern Denmark, DK-5230 Odense M, Denmark.

7 <sup>2</sup>Institute for Pathology, Odense University Hospital, DK-5000 Odense C, Denmark.

8

9 *\*Corresponding author:*

10 *Professor Ole N. Jensen, PhD, email: [jenseno@bmb.sdu.dk](mailto:jenseno@bmb.sdu.dk)*

11 Department of Biochemistry & Molecular Biology and VILLUM Center for Bioanalytical  
12 Sciences, University of Southern Denmark, DK-5230 Odense M, Denmark.

13 <sup>§</sup>Present address: Global Research Technologies, Novo Nordisk A/S, Novo Nordisk Park, DK-  
14 2760 Måløv, Denmark

15

16 **Keywords:**

17 Renal Cell Cancer, MALDI Mass Spectrometry Imaging (MALDI MSI), Microproteomics,  
18 Statistical Classification, Liquid Chromatography Mass Spectrometry (LC-MS)

19 **Total number of Figures: 7**

20 **Total Number of Tables: 1**

21

## 22 **Abstract**

23 *Pathology differentiation of renal cancer types is challenging due to tissue similarities or*  
24 *overlapping histological features of various tumor (sub)types. As assessment is often*  
25 *manually conducted outcomes can be prone to human error and therefore require high-level*  
26 *expertise and experience. Mass spectrometry can provide detailed histo-molecular*  
27 *information on tissue and is becoming increasingly popular in clinical settings. Spatially*  
28 *resolving technologies such as mass spectrometry imaging and quantitative microproteomics*  
29 *profiling in combination with machine learning approaches provide promising tools for*  
30 *automated tumor classification of clinical tissue sections.*

31 *In this proof of concept study we used MALDI-MS imaging (MSI) and rapid LC-MS/MS-based*  
32 *microproteomics technologies (15 min/sample) to analyze formalin-fixed paraffin embedded*  
33 *(FFPE) tissue sections and classify renal oncocytoma (RO, n=11), clear cell renal cell*  
34 *carcinoma (ccRCC, n=12) and chromophobe renal cell carcinoma (ChRCC, n=5). Both*  
35 *methods were able to distinguish ccRCC, RO and ChRCC in cross-validation experiments.*  
36 *MSI correctly classified 87% of the patients whereas the rapid LC-MS/MS-based*  
37 *microproteomics approach correctly classified 100% of the patients.*

38 *This strategy involving MSI and rapid proteome profiling by LC-MS/MS reveals molecular*  
39 *features of tumor sections and enables cancer subtype classification. Mass spectrometry*  
40 *provides a promising complementary approach to current pathological technologies for*  
41 *precise digitized diagnosis of diseases.*

42

## 43 **Introduction**

44 Kidney cancer (renal cell carcinoma, RCC) accounts for 2.2% of all diagnosed cancers and is  
45 the 13<sup>th</sup> most common cause of cancer deaths worldwide [1]. Clear cell renal cell carcinoma  
46 (ccRCC) constitutes 70% of all kidney cancers [2] and exhibits the highest rate of metastasis  
47 among renal carcinomas. Two other common but less aggressive subtypes of renal  
48 carcinoma are chromophobe renal cell carcinoma (ChRCC) and the essentially benign renal  
49 oncocytoma (RO), which account for 5% and 3-7 % of all cases, respectively [3, 4]. The ability  
50 to distinguish between the malignant cancer types ccRCC and ChRCC and the benign RO is  
51 crucial for a patient in terms of prognosis, progression and intervention strategies as severe  
52 as total nephrectomy. Histopathological kidney cancer diagnostics faces many challenges in  
53 daily routine. Typically, test panels consisting of a combination of different chemical and  
54 immuno-histochemical staining methods are used to systematically obtain a diagnosis [5].  
55 Overlapping histological features can make it difficult to differentiate tumor types. Analysis,  
56 interpretation and diagnosis/prognosis greatly rely on visual inspection and the experience of  
57 the involved clinical pathologists. Complementary techniques such as magnet resonance  
58 imaging (MRI) and electron microscopy involve costly instrumentation. Moreover, specific  
59 antibodies for staining can be expensive or unavailable for certain molecular targets. Mass  
60 spectrometry is emerging as a promising new tool in translational research, from molecular  
61 imaging of tissue sections to deep protein profiling of tissue samples [6]. The digital data  
62 readout provided by high mass accuracy mass spectrometry and feasibility of molecular  
63 quantification makes it a very attractive technology in translational research for investigating  
64 human diseases and for diagnostics and prognostics purposes in the clinic. Improvements in

65 mass spectrometry instrument performance and computational analysis paved the way for  
66 applications in clinical microbiology [7] and clinical genetics analysis [8]. The fact that mass  
67 spectrometry can be applied to a variety of different bio-molecules such as peptides, lipids,  
68 nucleic acid makes it extremely versatile and expands the translational and diagnostic  
69 possibilities greatly [8-11].

70 Molecular imaging of tissue sections by MALDI mass spectrometry (MSI) was introduced  
71 more than 20 years ago [12, 13] and it has been applied in translational research and clinical  
72 applications, to study injuries, diseases, or distinguish between different cancer types such as  
73 Pancreatic Ductal Adenocarcinoma or Epithelial Ovarian Cancer Histotypes [14-18].

74 Mass spectrometry-based proteomics relies on advanced LC-ESI-MS/MS technology, where  
75 peptide mixtures are separated by liquid chromatography (LC) prior analysis by electrospray  
76 ionization tandem mass spectrometry (ESI MS/MS) and protein identification by protein  
77 database searching [19, 20]. Current LC-MS/MS strategies enable comprehensive  
78 quantitative protein profiling from tissues and body fluids [21, 22]. While having been used to  
79 identify potential biomarkers or new candidate cancer targets and molecular signaling  
80 networks the relatively long LC gradients (hours) and extensive sample preparation protocols  
81 make it difficult to apply in a routine clinical setting. Modern mass spectrometers are steadily  
82 increasing in sensitivity and scanning speed [23]. In addition, improved chromatographic  
83 systems that enable rapid solid phase extraction integrated with reproducible separations are  
84 emerging [24-27], enabling fast (minutes) and sensitive (nanogram) analysis of complex  
85 biological samples.

86 We hypothesized that histo-molecular information from both MALDI MS imaging (MSI), *in situ*  
87 protein digestion and LC-MS/MS applied to detailed characterization of 5  $\mu\text{m}$  cancer formalin  
88 fixed paraffin embedded (FFPE) tissue sections will provide spatial molecular maps and  
89 sufficiently deep proteome profiles to characterize and classify tumor subtypes. We  
90 investigated this by testing a series of malignant and benign renal carcinomas, including clear  
91 cell renal cell carcinoma (ccRCC), chromophobe renal cell carcinoma (ChRCC) and renal  
92 oncocytoma (RO). We obtained histo-molecular images at a resolution of  $150\mu\text{m} \times 150\mu\text{m}$   
93 that sufficed to spatially resolve features to distinguish tumor subtype areas from surrounding  
94 tissue. Miniaturized sample preparation by *in situ* protein digestion was used to recover  
95 peptides from distinct areas of the FFPE tumor sections for rapid proteome profiling by LC-  
96 MS/MS.

97

## 98 **Material and Methods:**

### 99 **Materials**

100 Xylene (analytical grade), ammonium bicarbonate, Sodium citrate, trifluor-acetic acid (TFA),  
101 formic acid (FA), acetic acid (AcOH), acetonitrile (ACN), methanol and  $\alpha$ -Cyano-4-  
102 hydroxycinnamic acid (CHCA) were purchased from Sigma. Polyimide coated fused silica  
103 capillary (75  $\mu\text{m}$  ID) was from PostNova, C<sub>18</sub> Reprosil Pur reversed phase material was from  
104 Dr. Maisch (Ammerbuch-Entringe, Germany), recombinant Trypsin was purchased from  
105 Promega (WI. USA), Indium-tin-oxide (ITO) glass slides were purchased from Bruker  
106 (Bremen, Germany), water was Milli-Q filtered.

107 **Formalin fixed paraffin embedded samples:**

108 Patient samples were collected at Odense University Hospital, Denmark. All samples were  
109 obtained upon patient's consent. Formalin fixed paraffin embedded (FFPE) tissues from 11  
110 RO patients, 12 ccRCC patients and 5 ChRCC patients were used for LC-MSMS analysis (for  
111 ChRCC due to the lower number of patients 2 subsequent slides were used from 2 patients  
112 adding up to a total of 7 sections). Out of the patient cohort 9 RO, 9 ccRCC and 5 ChRCC  
113 were used for mass spectrometry imaging analysis.

114 **Tissue preparation:**

115 *Preparation of formalin fixed paraffin embedded samples*

116 FFPE blocks were cut into 5 µm thick sections and mounted onto indium tin oxide (ITO)  
117 covered glass slides (for MSI) or regular microscopy glass slides (for LC-MS/MS). Before  
118 deparaffination slides were left on a heated block at 65° C for 1 hour to improve adhesion (an  
119 overview on the used FFPE samples can be found in supplementary table S1 and S2).

120 *Deparaffination*

121 FFPE section slides were incubated in Xylene for an initial 10 min. and then another 5 min.  
122 using fresh solution each time. Slides were shortly dipped into 96% EtOH before they were  
123 washed for 2 min in a mixture of chloroform/Ethanol/AcOH (3:6:1; v:v:v). The slides were then  
124 washed in 96% EtOH, 70% EtOH, 50% EtOH and Water for 30 sec. each.

125 *Antigen retrieval*

126 Tissue slides were heated in 10mM citric acid buffer pH 6 for 10 min in a microwave oven at  
127 400 Watt (just below the boiling point) before left for further 60 min incubation at 98°C on a  
128 heating plate. Slides were cooled down to room temperature and incubated for 5 minutes in  
129 25 mM ammonium bicarbonate (ABC) buffer. Slides were allowed to dry before application of  
130 trypsin protease.

### 131 *Tryptic digest*

132 For MALDI MS imaging:

133 20µg of Trypsin (Promega) was used per slide and was dissolved at a concentration of  
134 100ng/µl in 25mM ABC /10% ACN before being deposited on the tissue using the  
135 iMatrixSpray [28] device equipped with a heating bed (Tardo GmbH, Subingen, Switzerland)  
136 using the following settings: sprayer height = 70mm, speed = 70mm/s, density = 1µL/cm<sup>2</sup>,  
137 line distance= 1 mm , gas pressure= 2.5 bar, heat bed temperature= 25°C . After trypsin  
138 deposition the slides were incubated in a humid chamber containing 10mM ABC/ 50% MeOH  
139 at 37°C over night.

140 For *on-tissue* digest intended for LC-MS/MS proteome profiling:

141 Droplets of 2µl Trypsin solution (50ng/µL in 25mM ABC /10%ACN, 0.02%SDS) were  
142 deposited using a gel loading pipet tip. Droplets were placed on 2-6 different tumor areas of  
143 each FFPE tissue section. The extraction positions were chosen randomly within the defined  
144 tumor margins which were defined by HE-stain and MSI clustering. The droplets were quickly  
145 allowed to dry to prevent spreading across the tissue. Slides were transferred to a closed  
146 humidity chamber (10mM ABC /50% MeOH) for overnight digestion at 37°C. The digestion



147 spots were extracted twice with 2 $\mu$ L of 0.1% FA and twice with 1.5 $\mu$ L of 30%ACN. Fractions  
148 were combined for each sample and speedvac dried. Samples were reconstituted in  
149 0.05%TFA and shortly spun down prior injection into the LC-MS system.

#### 150 *Matrix application*

151 Matrix solutions were freshly prepared from recrystallized  $\alpha$ -cyano-4-hydroxycinnamic acid  
152 (CHCA) matrix (10mg/mL in 50% Acetonitrile 1% TFA). Matrix was sprayed using the  
153 iMatrixSpray (Tardo, Switzerland). Temperature of the heatbed was set at 25°C. The sprayer  
154 distance was set to 70mm. Spray speed was set to 100 mm/s. Matrix was sprayed in 3  
155 rounds: 8 cycles with a flowrate of 0.5 $\mu$ L/cm<sup>2</sup> line distance of 1mm, 8 cycles of 1 $\mu$ L/cm<sup>2</sup> line  
156 distance of 1mm, 8 cycles of 1 $\mu$ L/cm<sup>2</sup> and a line distance of 2mm.

#### 157 *MALDI MS Imaging data acquisition*

158 Optical images of the tissue were obtained before matrix application using a flatbed scanner  
159 (Epson) at resolutions of 2400dpi. The imaging data was acquired via FlexImaging software  
160 (Bruker, Daltonics, Bremen, version 3.1) with 500 shots/ pixel on a Ultraflex extreme MALDI-  
161 TOF/TOF MS (Bruker Daltonics, Bremen) equipped with a SmartBeam laser (Nd:YAG 355  
162 nm). External mass calibration was performed with a tryptic digest of bovine serum albumin  
163 (Sigma). Spatial resolution was set to 150 $\mu$ m in x- and y-direction. Mass spectra were  
164 acquired in positive ion reflector mode in the range  $m/z$  600-3500. (An average sum spectrum  
165 of each cancer condition can be found in Supplementary material 1: Figure S1)

166

#### 167 *LC-MS/MS analysis*

168 LC-MS/MS data was acquired by an Orbitrap Q-Exactive HF-X (Thermo, Bremen) coupled to  
169 an Ultimate 3000 capillary flow LC-system. Setup was modified from Thermo Scientific  
170 Technical note: 72827. Peptide samples were loaded at 150 $\mu$ l/min (2% ACN, 0.05% TFA) for  
171 30 sec onto a 5 $\mu$ m, 0.3 x 5 mm, Acclaim PepMap trapping cartridge (Thermo Scientific).  
172 Samples were then eluted onto a pulled emitter analytical column (75 $\mu$ m ID, 15cm). The  
173 analytical column was “flash-packed” [29] with C<sub>18</sub> Reprosil Pur resin (3 $\mu$ m) and connected by  
174 Nanoviper fittings and a reducing metal union (Valco, Houston, TX). The flowrate of the 15  
175 min gradient was 1.2  $\mu$ L/min with solvent A: 0.1% formic acid (FA) and solvent B: 0.1% FA in  
176 80% ACN. Gradient conditions for solvent B were as followed: 8% to 25% in 10 min, 25% to  
177 45% in 1.7 min. The trapping cartridge and the analytical column were washed for 1 min at  
178 99%B before returning to initial conditions. The column was equilibrated for 2 min. MS  
179 settings: ESI spray voltage 2kV, cap temp=275°C, Resolution: 60k, micro scans =1, max IT  
180 =100 ms, AGC =3x10<sup>6</sup>, MSMS resolution 15k, n= top 5, max IT =100 ms, AGC = 1x10<sup>5</sup>.

181

#### 182 *Data Processing of MALDI MS imaging data*

183 The data was baseline subtracted, TIC normalized and statistically recalibrated and then  
184 exported into imzML format [30] using the export function of FlexImaging software (Bruker).  
185 The exported mass range was m/z 600-3000 with a binning size of 9600 data points. The  
186 imzML files were imported into the R environment (version: 3.4.1) and further processed and  
187 analyzed using the R MSI package: Cardinal (version: 2.0.3 & 2.4) [31]. In order to extract  
188 pixels of tumor tissue each sample was preprocessed as follows: peaklist was generated by

189 peak picking in every 10<sup>th</sup> spectrum and subsequent peak alignment. The whole data was  
190 then resampled using the “height” option and the previous created peaklist as spectrum  
191 reference. PCA scores were plotted using car-package (version 3.0.6). Samples were  
192 clustered using spatial shrunken centroid clustering [32]. Subsequently, clusters were  
193 compared to tumor regions in HE-stained tissue sections (supplementary material 1: Figure  
194 S2). The respective clusters containing tumor areas were extracted, so that result files  
195 predominantly contained data from tumor areas. The obtained coordinates were then used to  
196 extract the corresponding pixel from the unprocessed imzML file. Each tumor type was  
197 assigned with a diagnosis factor (ccRCC, RO or ChRCC), which was later used as y-  
198 argument in the cross-validation. All extracted imaging acquisition files were further restricted  
199 to a mass range of m/z 700-2500. Data was resampled with step size 0.25 Da to allow  
200 combining them into one file for further processing. Classification and cross-validation were  
201 performed using partial least square discriminant analysis (PLS-DA) [33]. PLS components  
202 were tested for optimum with 34 components (**supplementary material 1: Figure S3**).  
203 Classification diagnosis was based on the highest scoring condition. Differences between 2  
204 conditions had to be higher than 10% of the highest score to be considered distinguishable)

205

#### 206 *LC-MS/MS data processing*

207 The MaxQuant [34] software package (version 1.5.7.0) was used for protein identification and  
208 label-free protein quantitation. LC-MS/MS data was searched against the Swissprot human  
209 proteome database, using standard settings and “match between runs” enabled.

210 Data filtering, processing and statistical analysis of the MaxQuant output files was performed  
211 using the Perseus [35] framework (version 1.6.1.3). Data was filtered excluding the following  
212 hits: only identified by site, contaminants and reversed. The log-transformed data was filtered  
213 for proteins present in at least 70% of all experiments. Significance filtering was based on  
214 ANOVA testing, using FDR threshold of 0.01 with Benjamini Hochberg correction. In order to  
215 perform PCA analysis and classification missing values were imputed by normal distribution  
216 (separately for each column/sample). Data shown in heatmap was Z-score normalized.  
217 Perseus output tables were transferred into ClustVis [36] for visualization of hierarchical  
218 clustering and principle component analysis (PCA). Gene Ontology and functional analysis  
219 was performed via String DB (version 11.0.0) [37] and Panther DB (version 14.1) [38]. For  
220 Panther DB analysis background genome was the human genome and the total of identified  
221 proteins from all LC-MSMS runs in the experiments (supplementary material 4-8). Feature  
222 optimization cross-validation type was “n-fold” with n = 5. Kernel was either linear or RGF. All  
223 other settings were left on their default value.

224

225 **Results:**

226 In this study we investigated the utility of mass spectrometry-based methods for histo-  
227 molecular profiling applications in clinical renal cancer pathology. We analyzed thin  
228 tissue/tumor sections from three different renal cancer types (ccRCC, RO, ChRCC) by MALDI  
229 MS imaging and by an optimized rapid LC-MS/MS workflow adjusted to suit the demands for  
230 clinical settings.

231

232 *Imaging by MALDI mass spectrometry*

233 All samples were prepared as 5 µm thin FFPE tissue/tumor sections. The entire FFPE tissue  
234 section was analyzed by imaging MALDI MS imaging (MSI). The data was subsequently  
235 processed by unsupervised clustering (spatial shrunken centroid clustering [32]). The  
236 clustering results (**Figure 1A and 1B**) illustrate the heterogeneity of the tissue sections  
237 coming from various tissue types such as stroma, fibrotic, fatty or healthy tissue and the  
238 capabilities of imaging MSI for the delineation of cancerous and non-cancerous tissue.  
239 Furthermore, when comparing the tumor area of the HE-stain/microscopy with the results  
240 from the mass spectrometry imaging based clustering, spectral differences even within the  
241 tumor tissue itself can be observed (**Figure 1A and 1C**).

242 Guided by the unsupervised clustering outcome and the corresponding image obtained by  
243 HE-staining, pixels from non-relevant surrounding tissue were discarded and only pixel  
244 clusters containing actual tumor tissue were used for subsequent comparative analyses  
245 (schematic workflow overview can be found in supplementary material 1 : Figure S4).

246 In mass spectrometry imaging, principal component analysis (PCA) is often used for initial  
247 analysis of a given data set. Variance and similarities within the image sample set were  
248 estimated by PCA over the first 3 components. From a pathology viewpoint RO and ChRCC  
249 are more difficult to distinguish than ccRCC and ChRCC. As the sample holder for the  
250 imaging experiments can only hold 2 slides at a time, we first compared two conditions in a  
251 pairwise manner: 9 ccRCC vs. 9 RO (**Figure 2A**) and 5 RO vs. 5 ChRCC (**Figure 2B**). Then  
252 the data set was combined to compare all three cancer conditions (9 ccRCC, 9 RO, 5  
253 ChRCC) to each other (**Figure 2C**). PCA using the first three principle components separate  
254 ccRCC well from RO and ChRCC (**Figure 2A, 2C**). Data points from ccRCC showed a wide  
255 spread and were splitting into 2 sub-populations. In contrast, the data from RO and ChRCC  
256 samples cluster in a much tighter manner and with some overlap (**Figure 2A, 2B, 2C**). This is  
257 particularly the case when considering all three cancer types together (**Figure 2C**). When  
258 compared in a pairwise manner RO and ChRCC show slight separation (**Figure 2B**)  
259 suggesting at least some degree of histo-molecular differences between these cancer types.  
260 Some overlapping data points in the different cancer type datasets can be observed indicating  
261 histo-molecular spectral similarity in parts of the patient tumor tissues. The spread of ccRCC  
262 data points in PCA, as compared to the RO and ChRCC subtypes, suggests a greater  
263 heterogeneity among the ccRCC patient samples (also observed by LC-MS/MS, see later  
264 section).

265 Next, we assessed the ability of the MSI data to distinguish and classify renal cancer  
266 subtypes. We generated a classifier based on partial least squares discriminant analysis  
267 (PLS-DA) that can then be applied to a given MSI sample set. Due to the limited number of

268 FFPE kidney tumor samples we chose to use a cross-validation strategy that maximizes the  
269 use of a sample set for model generation and testing. In this approach a classifier is trained  
270 with imaging data from all samples, except for one sample that is set aside. As this sample is  
271 not part of the classifier model it can then be used for testing purposes. This was repeated as  
272 many times as there are samples ultimately allowing for testing the complete dataset (for n  
273 samples we obtain n classifiers and n tested samples).

274 The optimized PLS-DA model resulted in an accuracy of cancer subtype prediction of 93% for  
275 ccRCC and 88% for RO and for ChRCC (pixel based value). Results of the cross-validation  
276 study using PLS-DA to classify 23 kidney tumor samples are depicted in **Figure 3**. The PLS-  
277 DA prediction scores for each of the three possible tumor type outcomes are shown, i.e.  
278 ccRCC, RO and ChRCC. (Median values and boxplot representation of scores are provided  
279 in **supplementary material 1: Figure S5 and table S3**). The scores obtained for each pixel  
280 are presented by intensity scaled colors plotted over the respective x-y-coordinate of the  
281 tissue/tumor sections.

282 Twenty of the 23 patient tumor samples (assignment based on median value) were correctly  
283 assigned by the PLS-DA model showing highest intensity and median score for the respective  
284 cancer condition (**Figure 3**). Eight out of nine ccRCC samples were correctly assigned  
285 (**Figure 3a-i**). The PLS-DA classification provided high scores for ccRCC samples and clearly  
286 distinguished the ccRCC samples from the other two kidney tumor types (Figure 3, left  
287 panels). This is in accordance with the PCA results. Likewise, the PLS-DA model provided  
288 low scores for ccRCC in the cases of RO and ChRCC samples (Figure 3, middle and right  
289 panel). One ccRCC sample was incorrectly classified by PLS-DA as RO (**Figure 3g**).

290 All 5 ChRCC samples (**Figure 3 j-n**) were correctly assigned having the highest score for the  
291 ChRCC condition (right panel). PCA indicated mass spectral similarities between the RO and  
292 ChRCC samples. Likewise, the PLS-DA model reflects such similarities in the classification  
293 outcome. Two ChRCC patient samples received highest scores for ChRCC but only slightly  
294 lower scores for RO (**Figure 3k, 3n**). Furthermore, in the case of two RO sample (**Figure 3a,**  
295 **3e**) the classification could exclude ccRCC as diagnosis. Although the highest median score  
296 was correctly achieved for RO (Supplementary material 1: **table S3**) the difference between  
297 RO and ChRCC was considered as too small (<10% of respective max. median score) for a  
298 clear distinction of these two tumor types. Notably one kidney tumor sample (Figure 3l)  
299 exhibited a unusual scoring pattern as compared to the other tumor samples. This particular  
300 sample received high scores for both ccRCC and ChRCC classification (ChRCC being the  
301 highest). As mentioned above, we typically observed clear distinction between ccRCC and  
302 ChRCC in all the other cases. Upon further pathology and microproteomics analysis this  
303 tumor section was re-classified as a sarcomatoid transformation (see below), i.e. a tumor type  
304 not included in the PLS-DA model used for classification.

305 The relative importance of individual histo-molecular features of the classifier can be  
306 visualized by plotting the PLS coefficients for each condition as a function of m/z values  
307 (**supplementary material 1: Figure S6**). A positive coefficient indicates presence or higher  
308 abundance of the m/z value in the respective cancer model. A negative coefficient indicates  
309 absence or lower abundance in the respective condition. For ccRCC the two highest-ranking  
310 m/z values were m/z=723.5 and m/z=704.5. The two highest values for RO were m/z=806.5  
311 and m/z=1640.0 whereas the most influential signals for ChRCC comprised m/z= 1169.5 and



312 m/z=1039.5 (top 100 list of the features can be found in **supplementary material 2**).  
313 Unfortunately, we were not able to obtain informative MALDI MS/MS fragment ion spectra in  
314 order to reveal the identity of these peptide ion signals. Nevertheless, for classification  
315 purposes the knowledge of distinct protein/peptide identities (m/z values) is not necessary as  
316 long as the signal is characteristic for the tested condition.

317 In conclusion mass spectrometry imaging provided histo-molecular tumor profiles that can be  
318 used to distinguish renal cancer subtypes. However, the misclassification of one ccRCC  
319 patient and uncertainty of two additional diagnosis outcomes suggested that additional  
320 independent test methods would be beneficial for confident classification of renal cancer  
321 tumor types.

322

323 *LC-MS/MS based rapid proteome profiling of tumor sections.*

324 MALDI MS imaging provides spatial resolution that is helpful to address molecular  
325 heterogeneity in tissue sections. However, MALDI MS imaging lacks analytical depth due to  
326 the limited dynamic range of MALDI TOF MS and the poor performance of MALDI MS/MS for  
327 protein identification by peptide sequencing directly from tissue sections. Deeper insight into  
328 the tissue and tumor histo-molecular profiles and their variance will provide more diagnostic  
329 features. We therefore adapted and optimized a microproteomics approach, combining *in situ*  
330 protein sample preparation with fast label-free proteome profiling LC-MS/MS. First a  
331 miniaturized *in situ* sample preparation method was applied where a small droplet of trypsin  
332 solution is placed directly onto the tumor area of interest within a thin tissue section. After

333 overnight incubation the digested protein extract from the tumor area is subsequently  
334 recovered and analyzed by mass spectrometry [39]. We reduced the LC-MS/MS analysis time  
335 from 90 minutes to 15 min by using short LC gradients and rapid MS/MS functions, allowing  
336 for a sample throughput of up to 80 samples per day. A total of 125 *in situ* extracted areas  
337 from renal tumor sections were analyzed. Two to six *in situ* extracts were taken from each  
338 renal tumor sample (11 RO sections from 11 patients: 47 extraction spots; 12 ccRCC sections  
339 from 12 patients: 49 extraction spots; 7 ChRCC sections from 5 patients: 29 extraction spots).  
340 Fast label-free LC-MS/MS based microproteomics analysis of all 125 *in situ* digested tumor  
341 areas resulted in a total of 2124 identified human proteins. We filtered the data for proteins  
342 that were present in at least 70 % of all samples thereby reducing the protein number to 412  
343 proteins. Comparative data analysis was performed for proteins that were significantly altered  
344 (FDR=0.01) in any of the renal cancer subtypes resulting in a list of 346 differentially  
345 regulated proteins. We then used unsupervised hierarchical clustering and PCA to identify  
346 similarities and differences between the tumor samples. The x-axis dendrogram of the  
347 heatmap shows that the majority of the renal tumor samples grouped according to cancer  
348 subtype RO, ccRCC or ChRCC (**Figure 4A**). Several large clusters of “co-regulated” proteins  
349 are evident on the y-axis dendrogram and heatmap for the individual cancer subtypes. This  
350 clearly demonstrates that there are renal cancer subtype specific histo-molecular features and  
351 patterns in the microproteomics dataset.

352 The protein expression profiles of the three renal cancer subtypes are different based on the  
353 heatmap patterns. ccRCC clearly differs from RO and ChRCC (**Figure 4A**: Protein group 2

354 and 4). RO and ChRCC display some differences but generally exhibit a more similar  
355 expression pattern (**Figure 4A**: Protein Group 2).

356 These differences and similarities were also revealed by PCA analysis of the microproteomics  
357 dataset. RO and ChRCC separate clearly from ccRCC (**Figure 4B**). RO and ChRCC  
358 datapoints are located close together, indicating that differences between the RO and ChRCC  
359 cancer subtypes are less dominant. When considering principal components exhibiting less  
360 variance (PC3 and PC4), separation of RO and ChRCC sample data is observed (**Figure**  
361 **4B**).

362 We observed eight ChRCC proteomics datasets that separated clearly from the other ChRCC  
363 datasets, both in hierarchical clustering analysis (**Figure 4A**) and PCA (**Figure 4B**). The  
364 protein expression profile of these 8 samples exhibited some similarities to both ChRCC and  
365 ccRCC. Interestingly, this data originated from a tumor from a single patient. This was the  
366 same patient that also exhibited outlier MSI data with similarities to both ChRCC and ccRCC  
367 tumor types, as discussed above (Figure 3I). Further pathology analysis revealed that these  
368 samples were sarcomatoid renal cancer, originating from ChRCC and, thus, indeed different  
369 from the other ChRCC samples.

370

### 371 *Protein differences in cancer subtypes*

372 Hierarchical clustering of the proteomics datasets revealed major differences in relative  
373 protein abundance between the three renal cancer tumor types. (**Figure 4A**). We investigated  
374 the nature of these histo-molecular differences by examining the correlation of these proteins

375 to cellular structures, functions, or biochemical processes. Protein groups that exhibited  
376 distinctive abundances for the respective cancer type (**Figure 4**: ccRCC: group 1 & 4, RO:  
377 group 2, ChRCC: group 3) were searched for their involvement in protein interaction networks  
378 (supplementary material 9) as well as for their functional roles by using gene ontology (GO)  
379 enrichment (**Figure 5**, supplementary material 3-8). We compared GO enrichment relative to  
380 the experimental gene background as well as to the complete human genome (Figure 5,  
381 human genome background: red). The experimental gene background contained all genes  
382 corresponding to all 2124 identified proteins in the LC-MSMS experiments (Figure 5,  
383 experimental background: blue).

384 RO and ChRCC exhibited a set of upregulated proteins (**Figure 4A**, *protein group 2*) that  
385 were enriched for mitochondria associated proteins (GO:0005739), including various ATP  
386 synthase subunits. Enriched protein functions comprised *oxidative phosphorylation*  
387 (hsa00190), *citrate cycle* (hsa00020), and *fatty acid beta oxidation* (GO:0006635).

388 ChRCC-specific regulated proteins (**Figure 4A**, *protein group 3*) included cytoplasmic  
389 proteins (GO:0044444), and proteins associated with *cytoplasmic vesicles* (GO:0031982) and  
390 *ribonucleoprotein complexes* (GO:1990904).

391 Subtype-specific protein groups in ccRCC (**Figure 4A**, *protein group 1, 4*) were functionally  
392 enriched for *complement activation* (GO:0006956), *regulation of blood coagulation*  
393 (GO:0030193) and *platelet degranulation* (GO:0002576). Functions of *protein group 4* were  
394 linked with *extra cellular matrix organization* (GO:0043062) and *cytoskeletal binding*  
395 (GO:0008092) including proteins *collagen* and *laminin*. We also found several proteins such

396 as *glyceraldehyde-3-phosphate dehydrogenase* associated with the *glycolytic process*  
397 (GO:0006096).

398 These functionally important findings can be correlated to known biochemical and  
399 morphological features of each of the renal cancer subtypes. It is known that the number of  
400 mitochondria is increased in RO and ChRCC tumors (e.g. increased oxidative  
401 phosphorylation) [40]. It is also known that ccRCC contains a highly vascularized stroma  
402 (complement, coagulation, etc.) and exhibits a strong Warburg effect (glycolysis) [41]. Large  
403 intracellular vesicles are found in ChRCC (cytoplasmic proteins, vesicle proteins) [40].

404

#### 405 *Classification*

406 Unsupervised data analysis demonstrated the presence of renal cancer subtype specific  
407 differences in the tumor protein profiles. Next, we investigated the feasibility of tumor  
408 classification by using the microproteomics data to train a prediction algorithm. We  
409 implemented the tumor classification model by using a support vector machine (SVM)  
410 approach. The sarcomatoid sample was excluded from the classification. We chose the k-fold  
411 cross validation strategy [42] (“n-fold” in Perseus). Here the data is randomly distributed in k  
412 groups. The model was then trained with data from k-1 groups and the prediction was applied  
413 to the samples in the remaining group. This was repeated k times. Low k-values tend to  
414 overestimate error rates. In our study 2-6 extraction spots (samples) were derived from an  
415 FFPE section from each patient so too high k-values could underestimate the true error rate.  
416 We therefore tested the prediction error rate over several k-values (**Figure 6 A**) applying

417 Radial Basis Function (RBF) and linear kernel functions [43]. As imputation could have an  
418 effect on the classification outcome we compared performance to a classification without  
419 imputation using the proteins that were present in all sample (100% valid values=27 proteins).  
420 For 70% valid values the tested error rates were in the range 0-3.4% for linear (4 wrong  
421 predictions at k=2, linear kernel) and 0-2.6% (3 wrong predictions at k=2, RBF kernel).  
422 However, k=2 is a very low k-value (excluding half of the samples from the training set) and  
423 the error rate is most likely overestimated in this case. For more commonly used k-values  
424 (k=3-10) the error rate was 1.7% (2 incorrect predictions) at the highest for k=3 and 0% for  
425 any other k-value. Incorrectly predicted outcomes included samples from one RO patient that  
426 was predicted as ccRCC. Classification with the data set using 100% valid values without  
427 imputation showed error rates of 0-6% (linear kernel) and 0-3.5% (RBF kernel). Over higher  
428 k-values the error rate was 0-3.4% and 0-0.8%, respectively. Error rates were slightly higher  
429 than for 70% valid values. Given the low protein number used for the classification the  
430 outcome was surprisingly positive. In both cases 70% and 100% valid values we observed  
431 RBF performing overall slightly better than linear kernel. As error rates for both valid values  
432 were quite comparable, we concluded that in our case the imputation did not heavily bias the  
433 outcome.

434 Figure 6B exemplifies the outcome of the cross-validation resulted for RBF and k=5 (around  
435 23 samples per group equivalent to 4-5 patients excluded from the training set). Each sample  
436 was scored for the three tested conditions (ccRCC, RO, ChRCC). The highest scoring  
437 condition was used to classify a given sample. Results are shown in a radar plot (**Figure 6B**)  
438 and demonstrate 100% accuracy in prediction of renal cancer subtypes.

439 We initially used all 346 differentially abundant histo-molecular features (proteins) to classify  
440 the tumor subtypes. Next, we sought to estimate the minimum number of features that suffice  
441 to correctly classify all the renal tumor samples (for k=5 and RBF). We used the feature  
442 optimization function in the Perseus software, which first ranks the features and then tests the  
443 error rate for a decreasing number of features (**Figure 6C**). The minimal number out of the  
444 346 features was found to be 30 features (list of the ranked proteins can be found in  
445 supplementary material 9). Further reducing the number to 21 features resulted in an error  
446 rate of 0.8% and as little as 4 features lead to an error rate of 7.7%. Conclusively only a  
447 portion of the dataset, would suffice to successfully classify all the kidney tumor samples,  
448 which reflects also in the low error rates of the 100% valid values (**Figure 6A**) using only 27  
449 proteins (**supplementary material 3**). However, keeping an excess of quantified protein  
450 features would be beneficial as “safety margin” assuring a high enough number of quantified  
451 protein features for robust classification of tumors.

452

#### 453 *Data integration from MSI and rapid proteome profiling*

454 Having both MSI and microproteomics sets of data at hand provides several advantages for  
455 classification of cancer tumor FFPE samples. Using the MSI approach for tumor classification  
456 we observed a higher error rate than with the rapid micro-proteomics approach. In two cases  
457 MSI could exclude one cancer type but was not providing clear results towards an RO or a  
458 ChRCC diagnosis. Another case where one ccRCC sample was misclassified as RO is  
459 particularly problematic as ccRCC might need surgery whereas RO does not. Therefore, by

460 integrating the micro-proteomics classification data the outcome of the MSI classification can  
461 be further confirmed, clarified or rejected (**Table 1**). This allows more confidence in diagnosis  
462 or could possibly even provide further information on cancer stage or treatment strategies. In  
463 a case where the classification model does not cover the cancer condition such as in the  
464 patient sample with sarcomatoid transformation we have demonstrated how irregularities and  
465 inconsistencies are detected by both MSI and rapid LC-MS/MS based microproteomics  
466 (**Figure 3I, 5A, 5B**). This provides an opportunity to further investigate, refine and expand the  
467 range of computational and statistical classification models.

468 An additional application making use of the combined data set includes the investigation of  
469 histo-molecular properties observed in MSI (e.g. intra- tumor heterogeneity) by correlation to  
470 information from the rapid microproteomics approach. Usually a detailed investigation of MSI  
471 feature data is achieved by either microproteomics “in situ protein digestion” or laser  
472 microdissection based approaches [44] using LC-MS/MS based proteomics analysis with long  
473 LC gradient times (1-4 hours). Despite the shorter gradient times and thus lower protein  
474 coverage in the present work the information can nevertheless be used to investigate histo-  
475 molecular properties observed in MSI (e.g. intra- tumor heterogeneity). We exemplified this  
476 in figure 7, using the RO MSI data set previously shown (**Figure 1**, top). Unsupervised spatial  
477 shrunken centroid clustering of MSI data [32] revealed two distinct regions within the tumor  
478 area (**Figure 7A**: cluster 1 and cluster 2). Correlating the LC-MSMS data from the respective  
479 extraction spots within these distinct regions indeed reveals significant differential  
480 abundances in 80 proteins (**Figure 7B**, the list of proteins can be found in **supplementary**  
481 **material 11**). Hierarchical clustering (**Figure 7C**) of these 80 proteins with regard to their



482 extraction position correlates well with the distinct regions depicted by the MSI clustering (MSI  
483 Cluster 2 correlates with extraction spots e-f, MSI Cluster 2 correlates with extraction spots a-  
484 d; **Figure 7A**). The proteomics data suggests a lower abundance of mitochondrial associated  
485 proteins and a higher abundance in some cytoskeletal protein binding proteins in cluster 2  
486 (**Figure 7D**). The area comprising Cluster 2 located on the edge of the tumor and might  
487 indicate the differences that can be encountered between the inner and outer tumor regions  
488 [45].

489

## 490 **Discussion**

491 The increasing incidence of renal cancer in western countries calls for improved technologies  
492 for detection, diagnosis, treatment and prognosis. Innovative mass spectrometry-based  
493 applications are beginning to address challenges in clinics and the healthcare sector, such as  
494 the use of targeted proteomics to characterize noninvasive liquid biopsies [46] or the so called  
495 iKnife, enabling surgeons to identify cancerous tissue in real time [47, 48]. Mass spectrometry  
496 is becoming increasingly applicable in a clinical setting [49, 50]. FFPE sections are a valuable  
497 source for mass spectrometry-based diagnosis. As many of the sample preparation steps for  
498 MS analysis overlap with the preparation steps for (immuno)histochemical staining, they can  
499 be seamlessly fit into the high-throughput sample preparation pipeline for FFPE sections  
500 (deparaffination, antigen retrieval) already existing in many hospitals.

501 Our proof of concept study demonstrates the potential and benefits of mass spectrometry  
502 techniques for detailed characterization of clinical specimen. Specifically, we demonstrate

503 that mass spectrometry provides valuable results in the diagnosis of different renal cancer  
504 subtypes (ccRCC, RO and ChRCC). The imaging mass spectrometry (MSI) approach allows  
505 to collect spatially resolved spectra without *a priori* knowledge of the tissue, thereby enabling  
506 the differentiation between cancerous and noncancerous tissue, as well as subtyping of  
507 tumors.

508 Earlier large scale MSI classification studies have demonstrated results with accuracies  
509 ranging from 81% to nearly 100% in subtyping non-small cell lung cancer [51], classifying  
510 primary lung and pancreatic cancer [52] as well as differentiating between 6 common cancer  
511 types (esophagus, breast, colon, liver, stomach, thyroid gland) [53]. In our study MALDI-MSI  
512 could diagnose 87% (20 out of 23) of the tested patients correctly. It has to be pointed out that  
513 when transferring our study into a larger scale ( $n > 100$  samples) misclassification rates are  
514 expected to increase. In two of the 3 misclassified cases it was possible to narrow down the  
515 diagnosis to either RO or ChRCC. Despite the promising results the misclassification of one  
516 ccRCC sample as RO might be problematic since RO may not require surgery but ccRCC  
517 does. Both cases stress how using rapid proteome profiling data in parallel provided  
518 additional confidence and can help avoid a false negative prognosis.

519 Both MSI and LC-MS/MS PCA data showed that the patient-to-patient tumor variability is  
520 significant for ccRCC. Possible reasons might be due to necrotic areas or increased bleeding  
521 observed in some of the tissues. Furthermore we did not consider difference in grades, which  
522 might have an influence on the data spread. For robust MSI performance inclusion of a larger  
523 patient cohort ( $n > 100$ ) will likely provide higher confidence and resolve this issue or even  
524 provide differentiation of tumor grades.

525 LC-MS/MS based microproteomics analysis correctly classified all tested renal tumor samples  
526 in cross validation experiments. The efficient peptide separation and sequencing capability of  
527 LC-MS/MS provided deeper insight into the renal cancer proteome than possible by the MSI  
528 approach alone. Remarkably, unsupervised clustering identified data inconsistencies and  
529 irregularities in the patient cohort. An unexpected feature pattern revealed a sarcomatoid  
530 transformation within the ChRCC cohort, without *a priori* knowledge (**Figure 4A, 4B**). This  
531 goes to demonstrate that once the “digital” data is acquired then the computational and  
532 statistical applications can uncover relevant and important features of the patient datasets.  
533 This sensitivity, specificity and versatility will have major implications for future clinical  
534 practices, including histo-molecular pathology technologies.

535 Using short LC runs of only 15 min. we generated a list of 346 significantly altered proteins  
536 ( $p=0.01$ ). The minimum number of proteins determined to be necessary for 100% accurate  
537 tumor classification was much lower (30 features). This low number of features enables a  
538 targeted proteomics approach aimed at quantifying only a select panel of proteins. Using  
539 fewer features would also allow further reduction of LC run time and increase overall sample  
540 throughput. Using our fast LC-MS/MS setup we analyzed a total of 125 samples in a series  
541 without experiencing blocking of the LC columns, glass capillaries or ESI needles. LC  
542 systems such as the EvoSep system [25] that are specifically dedicated for clinical  
543 applications and tailored to be used also by non LC-MS experts can add additional  
544 robustness to this approach. Furthermore, implementation of image pattern guided pipetting  
545 robots may enhance reproducibility and throughput, e.g. using liquid extraction surface  
546 analysis (LESA) technology [54, 55]. The latter has been successfully applied in the study of

547 traumatic brain injuries [56] as well as in mouse brain for the identification of proteins and  
548 peptides from MSI experiments [57]. The missing value problem is still a common problem in  
549 label free quantitative proteomics. Successful implementation of protein identification on MS1  
550 level only has been presented recently [58] and could be interesting in the here presented  
551 context to follow up in future experiments.

552 Functional protein analysis using bioinformatics tools revealed molecular networks and  
553 biochemical processes consistent with previously known macroscopic, morphological and  
554 histological features of the renal cancer subtypes. RO and ChRCC exhibited upregulation of  
555 mitochondrial associated proteins. Increased numbers of mitochondria are frequently  
556 observed in these cancer types by electron microscopy [59] and have been identified in  
557 previous proteomics studies [60]. As most cancer rely on glycolysis (Warburg effect) this  
558 seems rather unusual. However, those mitochondria are dysfunctional and it has been  
559 speculated that the increase in number might be a cellular compensation response [61].

560 In addition increased intracytoplasmic associated proteins were detected in ChRCC  
561 distinguishing it from the other cancer types. Microscopically, ChRCC distinguishes from other  
562 renal carcinomas by its pale cytoplasm resulting from large intracytoplasmic vesicles  
563 explaining the relative increase of intracellular cytoplasm-associated proteins and vesicle  
564 proteins.

565 Clear cell renal cell carcinoma frequently contains zones of hemorrhage that are most likely  
566 responsible for the increased levels of complement and coagulation cascade associated  
567 proteins, as determined by our microproteomics method. ccRCC is also characterized by

568 hypervascular stroma [3], which may account for the enrichment of extracellular matrix  
569 proteins. Enhanced glycolysis as a hallmark of many cancer types including ccRCC [41]  
570 correlating well with our detection of upregulated glycolysis associated proteins.

571 For classification we applied PLS-DA to MSI data and support vector machine to the LC-  
572 MSMS data. These common classification methods have previously been applied to MSI for  
573 the differentiation of papillary and renal cell carcinoma based on lipidomics analysis [62] as  
574 well as for the classification of epithelial ovarian cancer subtypes [16]. There are, however,  
575 numerous other classification methods available. Mascini *et al.* used principal component  
576 linear discriminant analysis in order to predict treatment response in xenograft models of  
577 triple-negative breast cancer [63]. Recently, deep convolutional networks have been  
578 proposed [64].

579 Both MSI and short gradient LC-MS/MS microproteomics methods come with their individual  
580 advantages. Applying both approaches in parallel for routine analysis is most beneficial to  
581 improve confidence in diagnosis and identify irregularities. In order to create very robust  
582 classifiers for use in clinical settings the promising results of this study need to be further  
583 supported in the future by analysis of larger patient cohorts.

584 With the enormous progress in sample handling and instrument technology, machine learning  
585 [65] and the availability of new databases [66] mass spectrometry is on its way to become a  
586 versatile tool in the hospital clinics of the future.

587

588 **Acknowledgements and Funding**

589 Proteomics and mass spectrometry research at SDU are supported by generous grants to the  
590 VILLUM Center for Bioanalytical Sciences (VILLUM Foundation grant no. 7292 to O.N.J.) and  
591 PRO-MS: Danish National Mass Spectrometry Platform for Functional Proteomics (grant no.  
592 5072-00007B to O.N.J.). We thank Veit Schwämmle and Livia Rosa Fernandes for advice  
593 and discussion on the project.

594 **Authors Contributions:**

595 U.M., O.N.J. and N.M. planned and outlined the project. N.M. provided the patient samples  
596 and patient diagnosis. U.M. performed all experiments and data analysis. U.M. and O.N.J.  
597 wrote the manuscript.

598 **Competing Interests:**

599 The Authors declare no competing interest

600

## 601 **References**

602

- 603 1. Bray F, Ferlay J, Soerjomataram I, Siegel RL, Torre LA, Jemal A. Global cancer statistics 2018: GLOBOCAN  
604 estimates of incidence and mortality worldwide for 36 cancers in 185 countries. *CA Cancer J Clin.* 2018; 68:  
605 394-424. doi: 10.3322/caac.21492.
- 606 2. Jonasch E, Gao J, Rathmell WK. Renal cell carcinoma. *BMJ.* 2014; 349: g4797. doi: 10.1136/bmj.g4797.
- 607 3. Muglia VF, Prando A. Renal cell carcinoma: histological classification and correlation with imaging  
608 findings. *Radiol Bras.* 2015; 48: 166-74. doi: 10.1590/0100-3984.2013.1927.
- 609 4. Ng KL, Rajandram R, Morais C, Yap NY, Samaratunga H, Gobe GC, Wood ST. Differentiation of  
610 oncocytoma from chromophobe renal cell carcinoma (RCC): can novel molecular biomarkers help solve an old  
611 problem? *J Clin Pathol.* 2014; 67: 97-104. doi: 10.1136/jclinpath-2013-201895.
- 612 5. Carella R, Deleonardi G, D'Errico A, Salerno A, Egarter-Vigl E, Seebacher C, Donazzan G, Grigioni WF.  
613 Immunohistochemical panels for differentiating epithelial malignant mesothelioma from lung adenocarcinoma:  
614 a study with logistic regression analysis. *Am J Surg Pathol.* 2001; 25: 43-50. doi:  
615 6. Angelidis I, Simon LM, Fernandez IE, Strunz M, Mayr CH, Greiffo FR, Tsitsiridis G, Ansari M, Graf E,  
616 Strom TM, Nagendran M, Desai T, Eickelberg O, et al. An atlas of the aging lung mapped by single cell  
617 transcriptomics and deep tissue proteomics. *Nat Commun.* 2019; 10: 963. doi: 10.1038/s41467-019-08831-9.
- 618 7. Clark AE, Kaleta EJ, Arora A, Wolk DM. Matrix-assisted laser desorption ionization-time of flight mass  
619 spectrometry: a fundamental shift in the routine practice of clinical microbiology. *Clin Microbiol Rev.* 2013; 26:  
620 547-603. doi: 10.1128/CMR.00072-12.
- 621 8. Kriegsmann M, Wandernoth P, Lisenko K, Casadonte R, Longuespee R, Arens N, Kriegsmann J.  
622 Detection of HPV subtypes by mass spectrometry in FFPE tissue specimens: a reliable tool for routine  
623 diagnostics. *J Clin Pathol.* 2017; 70: 417-23. doi: 10.1136/jclinpath-2016-204017.
- 624 9. Ellis SR, Paine MRL, Eijkel GB, Pauling JK, Husen P, Jervelund MW, Hermansson M, Ejsing CS, Heeren  
625 RMA. Automated, parallel mass spectrometry imaging and structural identification of lipids. *Nat Methods.*  
626 2018; 15: 515-8. doi: 10.1038/s41592-018-0010-6.
- 627 10. Hannes Hinneburg PK, Falko Schirmeister, Slavko Gasparov, Peter, H. Seeberger VZ, Daniel Kolarich.  
628 Spatial glycomics of histopathological formalin-fixed and paraffin embedded (FFPE) tissue microdissections.  
629 *Molecular & Cell Proteomics.* 2016; in review. doi:
- 630 11. Moginger U, Grunewald S, Hennig R, Kuo CW, Schirmeister F, Voth H, Rapp E, Khoo KH, Seeberger PH,  
631 Simon JC, Kolarich D. Alterations of the Human Skin N- and O-Glycome in Basal Cell Carcinoma and Squamous  
632 Cell Carcinoma. *Front Oncol.* 2018; 8: 70. doi: 10.3389/fonc.2018.00070.
- 633 12. Caprioli RM, Farmer TB, Gile J. Molecular imaging of biological samples: localization of peptides and  
634 proteins using MALDI-TOF MS. *Anal Chem.* 1997; 69: 4751-60. doi: 10.1021/ac970888i.
- 635 13. Stoeckli M, Farmer TB, Caprioli RM. Automated mass spectrometry imaging with a matrix-assisted laser  
636 desorption ionization time-of-flight instrument. *J Am Soc Mass Spectrom.* 1999; 10: 67-71. doi: 10.1016/S1044-  
637 0305(98)00126-3.
- 638 14. Casadonte R, Kriegsmann M, Perren A, Baretton G, Deininger SO, Kriegsmann K, Welsch T, Pilarsky C,  
639 Kriegsmann J. Development of a Class Prediction Model to Discriminate Pancreatic Ductal Adenocarcinoma  
640 from Pancreatic Neuroendocrine Tumor by MALDI Mass Spectrometry Imaging. *Proteomics Clin Appl.* 2019; 13:  
641 e1800046. doi: 10.1002/prca.201800046.
- 642 15. Mascini NE, Teunissen J, Noorlag R, Willems SM, Heeren RMA. Tumor classification with MALDI-MSI  
643 data of tissue microarrays: A case study. *Methods.* 2018; 151: 21-7. doi: 10.1016/j.ymeth.2018.04.004.

- 644 16. Klein O, Kanter F, Kulbe H, Jank P, Denkert C, Nebrich G, Schmitt WD, Wu Z, Kunze CA, Sehouli J, Darb-  
645 Esfahani S, Braicu I, Lellmann J, et al. MALDI-Imaging for Classification of Epithelial Ovarian Cancer Histotypes  
646 from a Tissue Microarray Using Machine Learning Methods. *Proteomics Clin Appl*. 2019; 13: e1700181. doi:  
647 10.1002/prca.201700181.
- 648 17. Mallah K, Quanico J, Trede D, Kobeissy F, Zibara K, Salzet M, Fournier I. Lipid Changes Associated with  
649 Traumatic Brain Injury Revealed by 3D MALDI-MSI. *Anal Chem*. 2018; 90: 10568-76. doi:  
650 10.1021/acs.analchem.8b02682.
- 651 18. Briggs MT, Kuliwaba JS, Muratovic D, Everest-Dass AV, Packer NH, Findlay DM, Hoffmann P. MALDI  
652 mass spectrometry imaging of N-glycans on tibial cartilage and subchondral bone proteins in knee  
653 osteoarthritis. *Proteomics*. 2016; 16: 1736-41. doi: 10.1002/pmic.201500461.
- 654 19. Perkins DN, Pappin DJ, Creasy DM, Cottrell JS. Probability-based protein identification by searching  
655 sequence databases using mass spectrometry data. *Electrophoresis*. 1999; 20: 3551-67. doi:  
656 10.1002/(SICI)1522-2683(19991201)20:18<3551::AID-ELPS3551>3.0.CO;2-2.
- 657 20. Eng JK, McCormack AL, Yates JR. An approach to correlate tandem mass spectral data of peptides with  
658 amino acid sequences in a protein database. *J Am Soc Mass Spectrom*. 1994; 5: 976-89. doi: 10.1016/1044-  
659 0305(94)80016-2.
- 660 21. Zhao M, Yang Y, Guo Z, Shao C, Sun H, Zhang Y, Sun Y, Liu Y, Song Y, Zhang L, Li Q, Liu J, Li M, et al. A  
661 Comparative Proteomics Analysis of Five Body Fluids: Plasma, Urine, Cerebrospinal Fluid, Amniotic Fluid, and  
662 Saliva. *Proteomics Clin Appl*. 2018; 12: e1800008. doi: 10.1002/prca.201800008.
- 663 22. Schmidt A, Aebersold R. High-accuracy proteome maps of human body fluids. *Genome Biol*. 2006; 7:  
664 242. doi: 10.1186/gb-2006-7-11-242.
- 665 23. Eliuk S, Makarov A. Evolution of Orbitrap Mass Spectrometry Instrumentation. *Annu Rev Anal Chem*  
666 (Palo Alto Calif). 2015; 8: 61-80. doi: 10.1146/annurev-anchem-071114-040325.
- 667 24. Falkenby LG, Such-Sanmartin G, Larsen MR, Vorm O, Bache N, Jensen ON. Integrated solid-phase  
668 extraction-capillary liquid chromatography (speLC) interfaced to ESI-MS/MS for fast characterization and  
669 quantification of protein and proteomes. *J Proteome Res*. 2014; 13: 6169-75. doi: 10.1021/pr5008575.
- 670 25. Krieger JR, Wybenga-Groot LE, Tong J, Bache N, Tsao MS, Moran MF. Evosep One Enables Robust Deep  
671 Proteome Coverage Using Tandem Mass Tags while Significantly Reducing Instrument Time. *J Proteome Res*.  
672 2019; 18: 2346-53. doi: 10.1021/acs.jproteome.9b00082.
- 673 26. Horning OB, Kjeldsen F, Theodorsen S, Vorm O, Jensen ON. Isocratic solid phase extraction-liquid  
674 chromatography (SPE-LC) interfaced to high-performance tandem mass spectrometry for rapid protein  
675 identification. *J Proteome Res*. 2008; 7: 3159-67. doi: 10.1021/pr700865c.
- 676 27. Hørning O. B. TS, Vorm O., Jensen O. N. Solid phase extraction-liquid chromatography (SPE-LC)  
677 interface for automated peptide separation and identification by tandem mass spectrometry. *International*  
678 *Journal of Mass Spectrometry*. 2007; 268,: 147-57. doi: 10.1016/j.ijms.2007.06.017.
- 679 28. Stoeckli M, Staab D, Wetzel M, Brechbuehl M. iMatrixSpray: a free and open source sample  
680 preparation device for mass spectrometric imaging. *Chimia (Aarau)*. 2014; 68: 146-9. doi:  
681 10.2533/chimia.2014.146.
- 682 29. Kovalchuk SI, Jensen ON, Rogowska-Wrzesinska A. FlashPack: Fast and Simple Preparation of Ultrahigh-  
683 performance Capillary Columns for LC-MS. *Mol Cell Proteomics*. 2019; 18: 383-90. doi:  
684 10.1074/mcp.TIR118.000953.
- 685 30. Rompp A, Schramm T, Hester A, Klinkert I, Both JP, Heeren RM, Stockli M, Spengler B. imzML: Imaging  
686 Mass Spectrometry Markup Language: A common data format for mass spectrometry imaging. *Methods Mol*  
687 *Biol*. 2011; 696: 205-24. doi: 10.1007/978-1-60761-987-1\_12.



- 688 31. Bemis KD, Harry A, Eberlin LS, Ferreira C, van de Ven SM, Mallick P, Stolowitz M, Vitek O. Cardinal: an R  
689 package for statistical analysis of mass spectrometry-based imaging experiments. *Bioinformatics*. 2015; 31:  
690 2418-20. doi: 10.1093/bioinformatics/btv146.
- 691 32. Bemis KD, Harry A, Eberlin LS, Ferreira CR, van de Ven SM, Mallick P, Stolowitz M, Vitek O. Probabilistic  
692 Segmentation of Mass Spectrometry (MS) Images Helps Select Important Ions and Characterize Confidence in  
693 the Resulting Segments. *Mol Cell Proteomics*. 2016; 15: 1761-72. doi: 10.1074/mcp.O115.053918.
- 694 33. Wold S, Sjostrom M, Eriksson L. PLS-regression: a basic tool of chemometrics. *Chemometrics and  
695 Intelligent Laboratory Systems*. 2001; 58: 109-30. doi: Doi 10.1016/S0169-7439(01)00155-1.
- 696 34. Cox J, Mann M. MaxQuant enables high peptide identification rates, individualized p.p.b.-range mass  
697 accuracies and proteome-wide protein quantification. *Nat Biotechnol*. 2008; 26: 1367-72. doi:  
698 10.1038/nbt.1511.
- 699 35. Tyanova S, Temu T, Sinitcyn P, Carlson A, Hein MY, Geiger T, Mann M, Cox J. The Perseus  
700 computational platform for comprehensive analysis of (prote)omics data. *Nat Methods*. 2016; 13: 731-40. doi:  
701 10.1038/nmeth.3901.
- 702 36. Metsalu T, Vilo J. ClustVis: a web tool for visualizing clustering of multivariate data using Principal  
703 Component Analysis and heatmap. *Nucleic Acids Res*. 2015; 43: W566-70. doi: 10.1093/nar/gkv468.
- 704 37. Szklarczyk D, Gable AL, Lyon D, Junge A, Wyder S, Huerta-Cepas J, Simonovic M, Doncheva NT, Morris  
705 JH, Bork P, Jensen LJ, Mering CV. STRING v11: protein-protein association networks with increased coverage,  
706 supporting functional discovery in genome-wide experimental datasets. *Nucleic Acids Res*. 2019; 47: D607-D13.  
707 doi: 10.1093/nar/gky1131.
- 708 38. Thomas PD, Campbell MJ, Kejariwal A, Mi H, Karlak B, Daverman R, Diemer K, Muruganujan A,  
709 Narechania A. PANTHER: a library of protein families and subfamilies indexed by function. *Genome Res*. 2003;  
710 13: 2129-41. doi: 10.1101/gr.772403.
- 711 39. Wisztorski M, Fatou B, Franck J, Desmons A, Farre I, Leblanc E, Fournier I, Salzet M. Microproteomics by  
712 liquid extraction surface analysis: application to FFPE tissue to study the fimbria region of tubo-ovarian cancer.  
713 *Proteomics Clin Appl*. 2013; 7: 234-40. doi: 10.1002/prca.201200070.
- 714 40. **John. Eble LC.** (2009). CHAPTER 30 - Renal Neoplasia. In: Noel Weidner RJC, Saul Suster, Lawrence M.  
715 Weiss, ed. *Modern Surgical Pathology (Second Edition)*: W.B. Saunders), pp. 1043-78.
- 716 41. Courtney KD, Bezwada D, Mashimo T, Pichumani K, Vemireddy V, Funk AM, Wimberly J, McNeil SS,  
717 Kapur P, Lotan Y, Margulis V, Cadeddu JA, Pedrosa I, et al. Isotope Tracing of Human Clear Cell Renal Cell  
718 Carcinomas Demonstrates Suppressed Glucose Oxidation In Vivo. *Cell Metab*. 2018; 28: 793-800 e2. doi:  
719 10.1016/j.cmet.2018.07.020.
- 720 42. Hastie T, Tibshirani R, Friedman J. (2009). Model Assessment and Selection. *The Elements of Statistical  
721 Learning: Data Mining, Inference, and Prediction*. (New York, NY: Springer New York), pp. 219-59.
- 722 43. Hastie T, Tibshirani R, Friedman J. (2009). Kernel Smoothing Methods. *The Elements of Statistical  
723 Learning: Data Mining, Inference, and Prediction*. (New York, NY: Springer New York), pp. 191-218.
- 724 44. Dewez F, Martin-Lorenzo M, Herfs M, Baiwir D, Mazzucchelli G, De Pauw E, Heeren RMA, Balluff B.  
725 Precise co-registration of mass spectrometry imaging, histology, and laser microdissection-based omics. *Anal  
726 Bioanal Chem*. 2019; 411: 5647-53. doi: 10.1007/s00216-019-01983-z.
- 727 45. Oppenheimer SR, Mi D, Sanders ME, Caprioli RM. Molecular analysis of tumor margins by MALDI mass  
728 spectrometry in renal carcinoma. *J Proteome Res*. 2010; 9: 2182-90. doi: 10.1021/pr900936z.
- 729 46. Kim Y, Jeon J, Mejia S, Yao CQ, Ignatchenko V, Nyalwidhe JO, Gramolini AO, Lance RS, Troyer DA, Drake  
730 RR, Boutros PC, Semmes OJ, Kislinger T. Targeted proteomics identifies liquid-biopsy signatures for  
731 extracapsular prostate cancer. *Nature Communications*. 2016; 7. doi: ARTN 11906  
732 10.1038/ncomms11906.

- 733 47. Phelps DL, Balog J, Gildea LF, Bodai Z, Savage A, El-Bahrawy MA, Speller AV, Rosini F, Kudo H, McKenzie  
734 JS, Brown R, Takats Z, Ghaem-Maghami S. The surgical intelligent knife distinguishes normal, borderline and  
735 malignant gynaecological tissues using rapid evaporative ionisation mass spectrometry (REIMS). *Br J Cancer*.  
736 2018; 118: 1349-58. doi: 10.1038/s41416-018-0048-3.
- 737 48. Schafer KC, Denes J, Albrecht K, Szaniszló T, Balog J, Skoumal R, Katona M, Toth M, Balogh L, Takats Z.  
738 In vivo, in situ tissue analysis using rapid evaporative ionization mass spectrometry. *Angew Chem Int Ed Engl*.  
739 2009; 48: 8240-2. doi: 10.1002/anie.200902546.
- 740 49. Heaney LM, Jones DJ, Suzuki T. Mass spectrometry in medicine: a technology for the future? *Future Sci*  
741 *OA*. 2017; 3: FSO213. doi: 10.4155/fsoa-2017-0053.
- 742 50. Longuespee R, Casadonte R, Schwamborn K, Kriegsmann M. Proteomics in Pathology: The Special Issue.  
743 *Proteomics Clin Appl*. 2019; 13: e1800167. doi: 10.1002/prca.201800167.
- 744 51. Kriegsmann M, Casadonte R, Kriegsmann J, Dienemann H, Schirmacher P, Hendrik Kobarg J,  
745 Schwamborn K, Stenzinger A, Warth A, Weichert W. Reliable Entity Subtyping in Non-small Cell Lung Cancer by  
746 Matrix-assisted Laser Desorption/Ionization Imaging Mass Spectrometry on Formalin-fixed Paraffin-embedded  
747 Tissue Specimens. *Mol Cell Proteomics*. 2016; 15: 3081-9. doi: 10.1074/mcp.M115.057513.
- 748 52. Boskamp T, Lachmund D, Oetjen J, Cordero Hernandez Y, Trede D, Maass P, Casadonte R, Kriegsmann J,  
749 Warth A, Dienemann H, Weichert W, Kriegsmann M. A new classification method for MALDI imaging mass  
750 spectrometry data acquired on formalin-fixed paraffin-embedded tissue samples. *Biochim Biophys Acta*  
751 *Proteins Proteom*. 2017; 1865: 916-26. doi: 10.1016/j.bbapap.2016.11.003.
- 752 53. Meding S, Nitsche U, Balluff B, Elsner M, Rauser S, Schone C, Nipp M, Maak M, Feith M, Ebert MP,  
753 Friess H, Langer R, Hofler H, et al. Tumor classification of six common cancer types based on proteomic  
754 profiling by MALDI imaging. *J Proteome Res*. 2012; 11: 1996-2003. doi: 10.1021/pr200784p.
- 755 54. Wiszorski M, Desmons A, Quanico J, Fatou B, Gimeno JP, Franck J, Salzet M, Fournier I. Spatially-  
756 resolved protein surface microsampling from tissue sections using liquid extraction surface analysis.  
757 *Proteomics*. 2016; 16: 1622-32. doi: 10.1002/pmic.201500508.
- 758 55. Wiszorski M, Quanico J, Franck J, Fatou B, Salzet M, Fournier I. Droplet-Based Liquid Extraction for  
759 Spatially-Resolved Microproteomics Analysis of Tissue Sections. *Methods Mol Biol*. 2017; 1618: 49-63. doi:  
760 10.1007/978-1-4939-7051-3\_6.
- 761 56. Mallah K, Quanico J, Raffo-Romero A, Cardon T, Aboulouard S, Devos D, Kobeissy F, Zibara K, Salzet M,  
762 Fournier I. Mapping Spatiotemporal Microproteomics Landscape in Experimental Model of Traumatic Brain  
763 Injury Unveils a link to Parkinson's Disease. *Mol Cell Proteomics*. 2019; 18: 1669-82. doi:  
764 10.1074/mcp.RA119.001604.
- 765 57. Ryan DJ, Nei D, Prentice BM, Rose KL, Caprioli RM, Spraggins JM. Protein identification in imaging mass  
766 spectrometry through spatially targeted liquid micro-extractions. *Rapid Commun Mass Spectrom*. 2018; 32:  
767 442-50. doi: 10.1002/rcm.8042.
- 768 58. Ivanov MV, Bubis JA, Gorshkov V, Tarasova IA, Levitsky LI, Lobas AA, Solovyeva EM, Pridatchenko ML,  
769 Kjeldsen F, Gorshkov MV. DirectMS1: MS/MS-Free Identification of 1000 Proteins of Cellular Proteomes in 5  
770 Minutes. *Anal Chem*. 2020; 92: 4326-33. doi: 10.1021/acs.analchem.9b05095.
- 771 59. Thoenes W, Storkel S, Rumpelt HJ. Human chromophobe cell renal carcinoma. *Virchows Arch B Cell*  
772 *Pathol Incl Mol Pathol*. 1985; 48: 207-17. doi: 10.1007/bf02890129.
- 773 60. Drendel V, Heckelmann B, Schell C, Kook L, Biniössek ML, Werner M, Jilg CA, Schilling O. Proteomic  
774 distinction of renal oncocytomas and chromophobe renal cell carcinomas. *Clin Proteomics*. 2018; 15: 25. doi:  
775 10.1186/s12014-018-9200-6.
- 776 61. Gasparre G, Romeo G, Rugolo M, Porcelli AM. Learning from oncocytic tumors: Why choose inefficient  
777 mitochondria? *Biochim Biophys Acta*. 2011; 1807: 633-42. doi: 10.1016/j.bbabi.2010.08.006.

- 778 62. Dill AL, Eberlin LS, Zheng C, Costa AB, Ifa DR, Cheng L, Masterson TA, Koch MO, Vitek O, Cooks RG.  
779 Multivariate statistical differentiation of renal cell carcinomas based on lipidomic analysis by ambient  
780 ionization imaging mass spectrometry. *Anal Bioanal Chem.* 2010; 398: 2969-78. doi: 10.1007/s00216-010-4259-  
781 6.
- 782 63. Mascini NE, Eijkel GB, ter Brugge P, Jonkers J, Wesseling J, Heeren RM. The use of mass spectrometry  
783 imaging to predict treatment response of patient-derived xenograft models of triple-negative breast cancer. *J*  
784 *Proteome Res.* 2015; 14: 1069-75. doi: 10.1021/pr501067z.
- 785 64. Behrmann J, Etmann C, Boskamp T, Casadonte R, Kriegsmann J, Maass P. Deep learning for tumor  
786 classification in imaging mass spectrometry. *Bioinformatics.* 2018; 34: 1215-23. doi:  
787 10.1093/bioinformatics/btx724.
- 788 65. Jordan MI, Mitchell TM. Machine learning: Trends, perspectives, and prospects. *Science.* 2015; 349:  
789 255-60. doi: 10.1126/science.aaa8415.
- 790 66. Gessulat S, Schmidt T, Zolg DP, Samaras P, Schnatbaum K, Zerweck J, Knaute T, Rechenberger J,  
791 Delanghe B, Huhmer A, Reimer U, Ehrlich HC, Aiche S, et al. Prosit: proteome-wide prediction of peptide  
792 tandem mass spectra by deep learning. *Nat Methods.* 2019; 16: 509-18. doi: 10.1038/s41592-019-0426-7.

793

794

795 **Table 1**

| Pathologist diagnosis | Patient | MSI diagnosis             | Rapid LC-MSMS diagnosis   | Conclusion                                       |
|-----------------------|---------|---------------------------|---------------------------|--------------------------------------------------|
| RO                    | 839     | RO/ChRCC                  | RO                        | RO                                               |
| RO                    | 119     | RO                        | RO                        | RO                                               |
| RO                    | 527     | RO                        | RO                        | RO                                               |
| RO                    | 270     | RO                        | RO                        | RO                                               |
| RO                    | 529     | RO/ChRCC                  | RO                        | RO                                               |
| RO                    | 560     | RO                        | RO                        | RO                                               |
| RO                    | 940     | RO                        | RO                        | RO                                               |
| RO                    | 857     | RO                        | RO                        | RO                                               |
| RO                    | 381     | RO                        | RO                        | RO                                               |
| ccRCC                 | 427     | ccRCC                     | ccRCC                     | ccRCC                                            |
| ccRCC                 | 370     | ccRCC                     | ccRCC                     | ccRCC                                            |
| ccRCC                 | 620     | ccRCC                     | ccRCC                     | ccRCC                                            |
| ccRCC                 | 73      | ccRCC                     | ccRCC                     | ccRCC                                            |
| ccRCC                 | 545     | ccRCC                     | ccRCC                     | ccRCC                                            |
| ccRCC                 | 999     | ccRCC                     | ccRCC                     | ccRCC                                            |
| ccRCC                 | 797     | RO                        | ccRCC                     | ccRCC/further validation                         |
| ccRCC                 | 601     | ccRCC                     | ccRCC                     | ccRCC                                            |
| ccRCC                 | 336     | ccRCC                     | ccRCC                     | ccRCC                                            |
| ChRCC                 | 634     | ChRCC                     | ChRCC                     | ChRCC                                            |
| ChRCC                 | 835     | ChRCC                     | ChRCC                     | ChRCC                                            |
| ChRCC                 | 264*    | ChRCC with irregularities | ChRCC with irregularities | further validation -> sarcomatoid transformation |
| ChRCC                 | 756     | ChRCC                     | ChRCC                     | ChRCC                                            |
| ChRCC                 | 925     | ChRCC                     | ChRCC                     | ChRCC                                            |

796

797 **Figure 1**

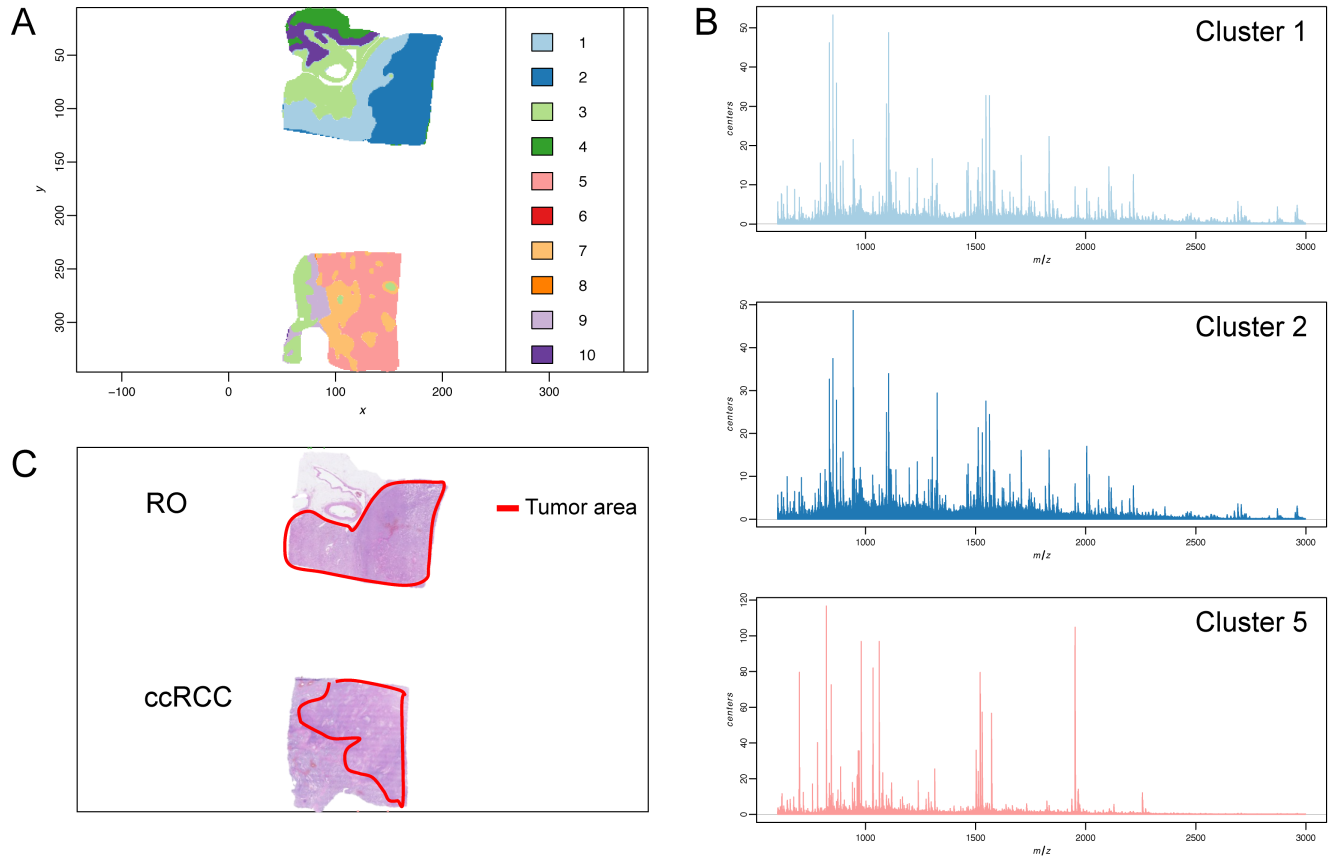

798

799

800 **Figure 2**

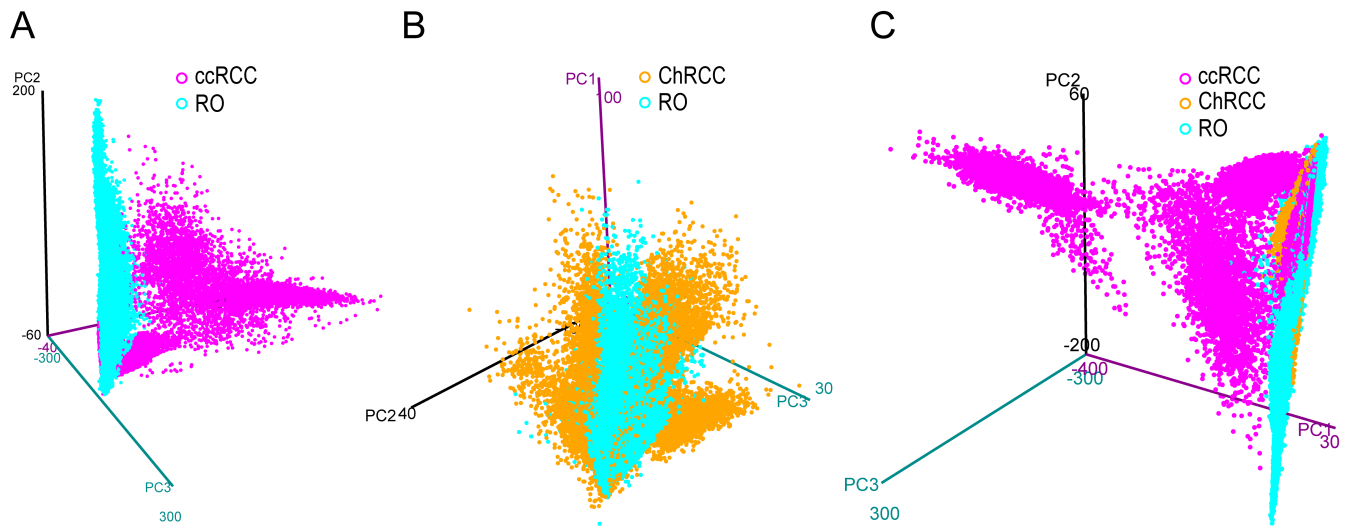

801

802

803

804 **Figure 3**

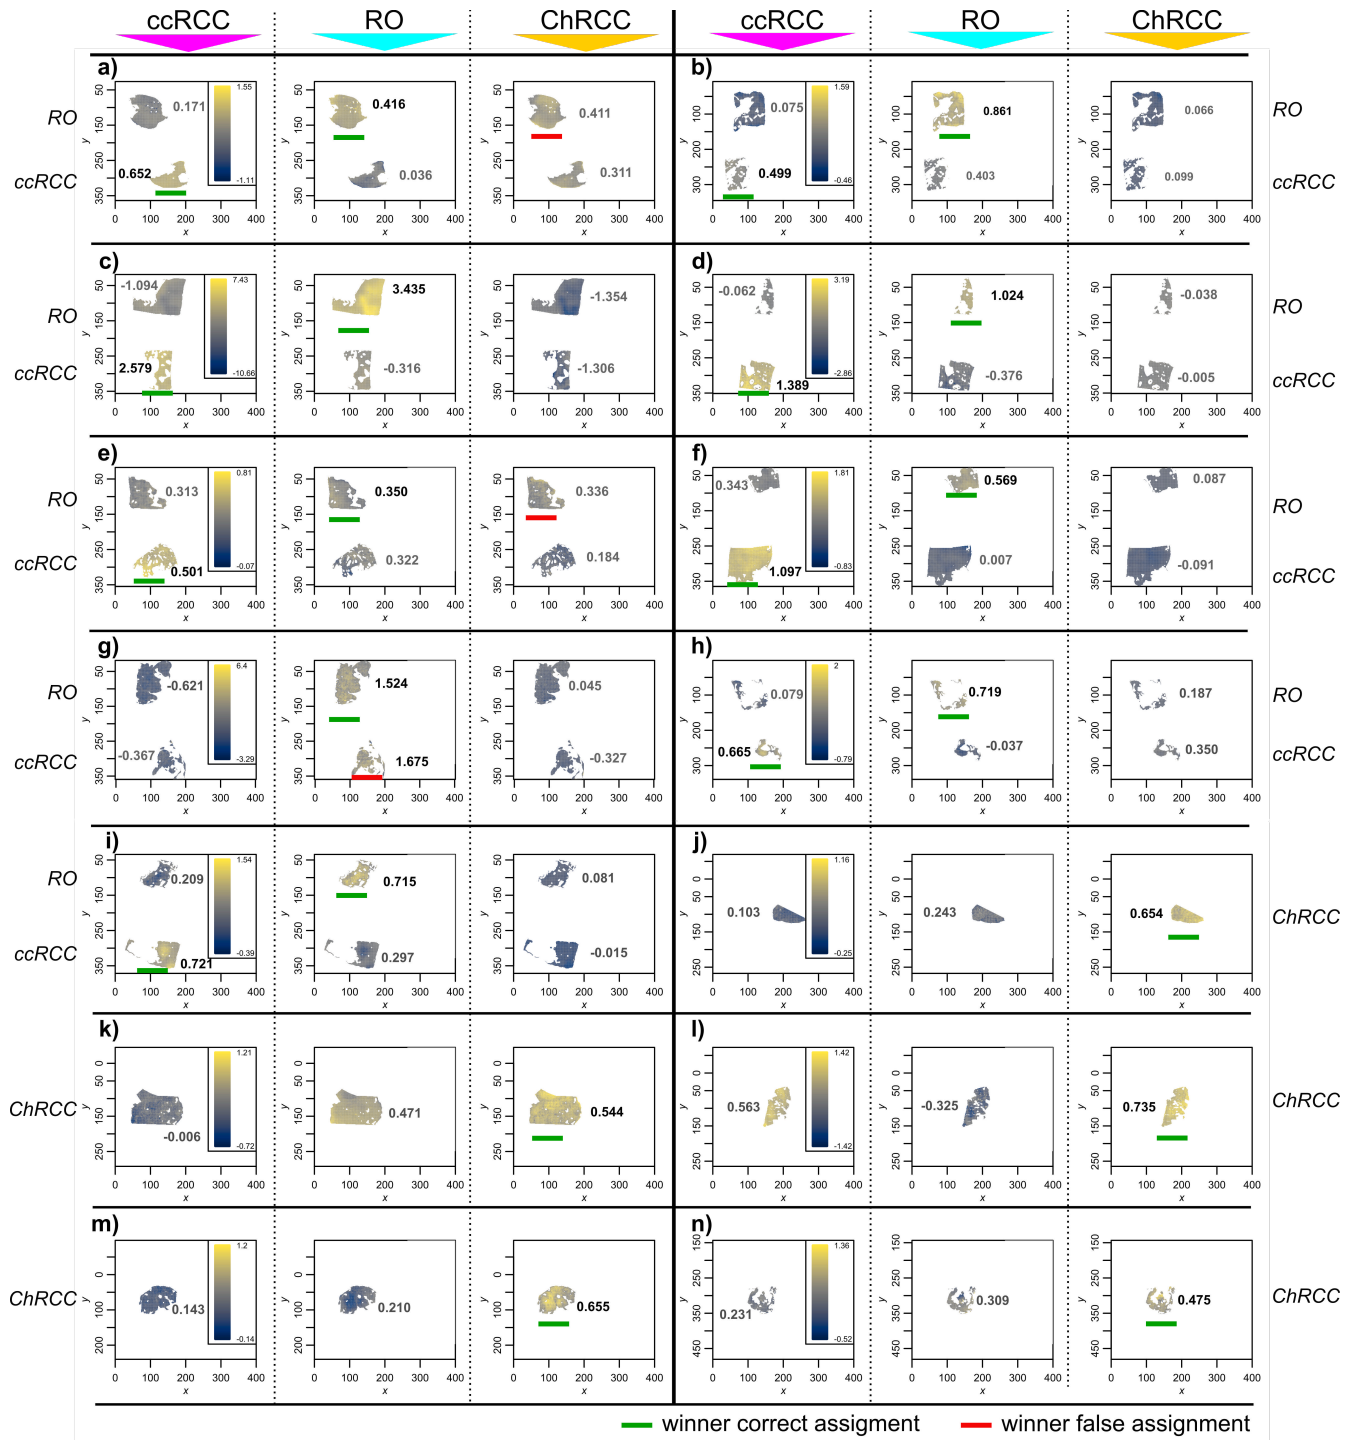

805

806

807 **Figure 4**

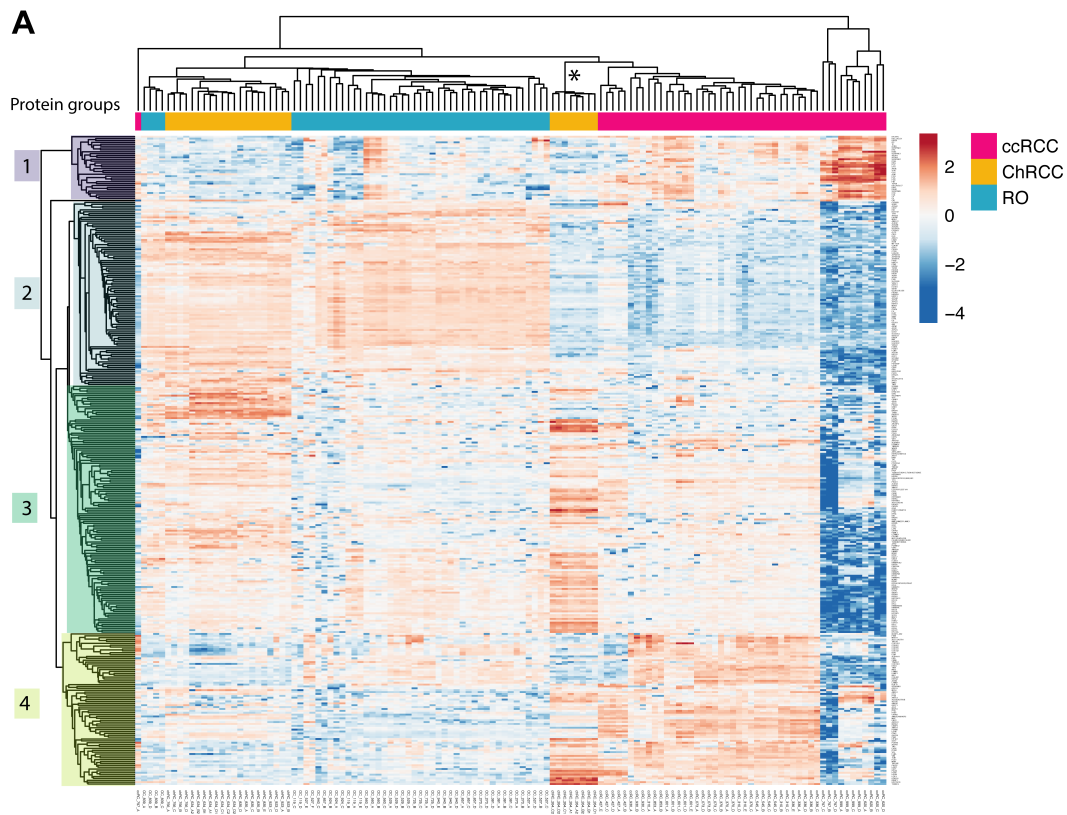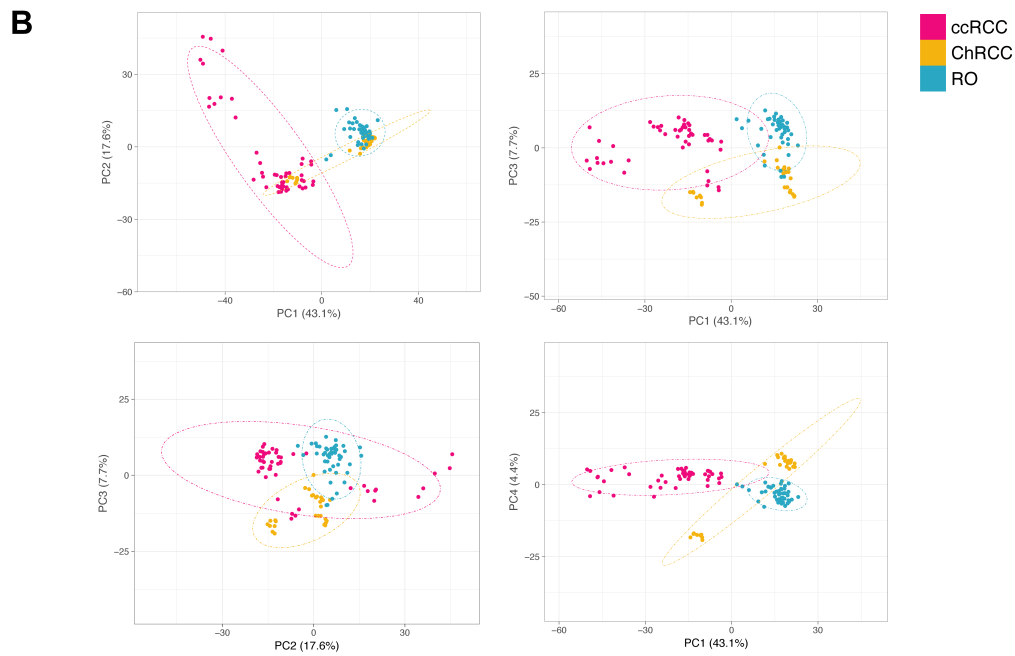

808



809 **Figure 5**

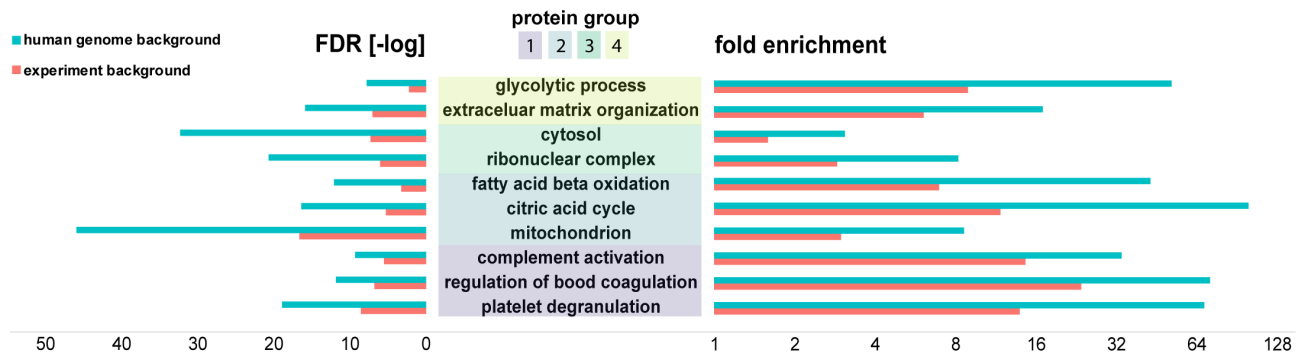

810

811

812 **Figure 6**

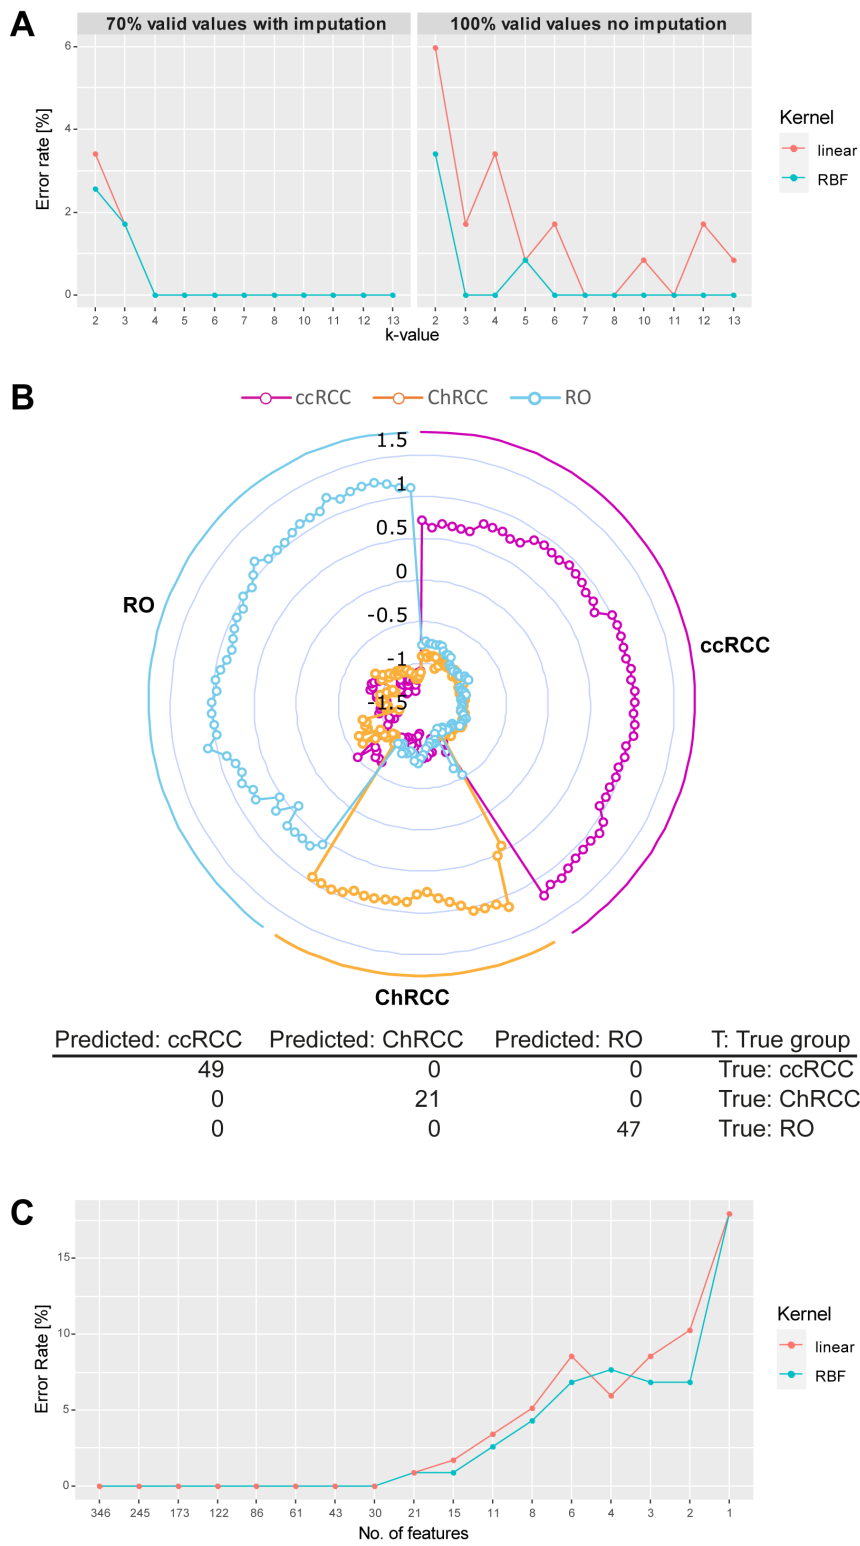

813

814 **Figure 7**

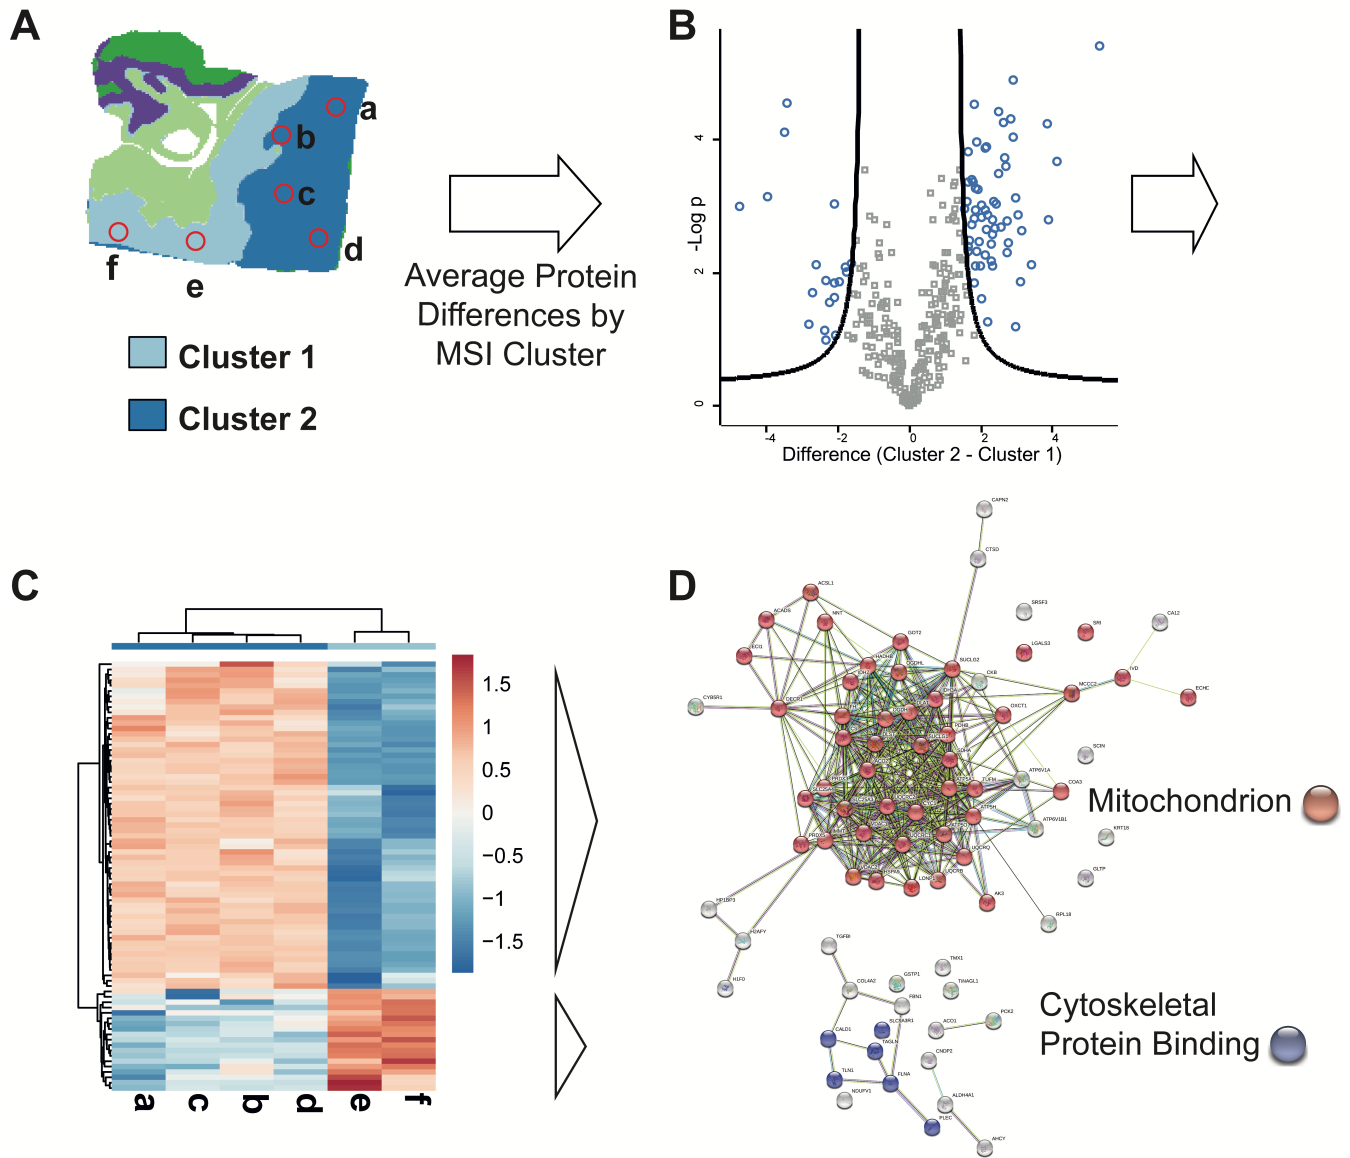

815

816

817 **Table 1:** integrated testing strategy for classification of renal cancer types. Initial pathologist  
818 diagnosis and patient number are indicated in the first 2 columns. \*Patient sample showed  
819 irregularities and after reassessment could be diagnosed as sarcomatoid transformation.  
820 Concluding contradictory results would either necessitate further validation or the outcome of  
821 the more reliable method (LC-MSMS) could be favored

822

823 **Figure 1** Tumor sample heterogeneity is revealed by mass spectrometry imaging and  
824 unsupervised clustering. A) Spatial Shrunken centroid clustering of ccRCC and RO data  
825 obtained by imaging mass spectrometry of ccRCC and RO tissue sections. Based on  
826 differences and similarities in the spectra each pixel was automatically assigned a certain  
827 cluster (indicated by a different color). B) Average MALDI mass spectra of the respective  
828 tumor areas (histo-molecular clusters) reveal distinct features and individual variations in the  
829 m/z signals. C) HE-stain of tumor tissue section from same FFPE block. Tumor area is  
830 indicated in red.

831

832 **Figure 2:** 3D PCA score plot from imaging MALDI MS experiments of kidney tumor tissues.  
833 Each plot contains the extracted pixel data from all patients of a given cancer type. Data from  
834 ccRCC (A) (magenta) and ChRCC (B) (blue) are compared to RO (yellow). (C) Data from all  
835 three cancer types are compared to each other. The graph displays the first 3 principle  
836 components (PC1, PC2, PC3) plotted against each other. Clear separation of data points  
837 between ccRCC and RO can be observed by pairwise comparison but also in the combined

838 comparison to both RO and ChRCC. In pairwise comparison (B) RO and ChRCC show slight  
839 separation but exhibit a great number of overlapping features. ccRCC exhibits the largest  
840 differences to RO and ChRCC. RO and ChRCC appear to share more spectral similarities.

841

842 **Figure 3:** Tumor classification by MALDI MS imaging and cross-validation using PLS-DA  
843 classification. Unit of x- and y-axis equals step size (150 $\mu$ m). Classification was performed on  
844 extracted pixels/spectra from tumor areas only. Classification of 9 ccRCC and 9 RO (a-i)  
845 sample as well as 5 RO sample and 5 ChRCC sample (j-n). Pathology diagnosis of the  
846 respective patient samples are indicated to the left and right of the images (*RO*, *ccRCC* or  
847 *ChRCC*). Each spectrum-containing pixel is predicted individually. The prediction scores are  
848 represented by a color scale. Each patient sample was scored for the 3 cancer conditions  
849 resulting in 3 panels for each condition. Each of the panels displays scores for ccRCC (first  
850 panel) RO (second panel) and ChRCC (third panel). The respective testing condition is  
851 indicated on top above the panels. Median score for the respective condition is indicated in  
852 each panel next to the tissue. Classification is based on the condition achieving the highest  
853 score within the 3 predictions. Differences below 10% of the respective highest score were  
854 considered too close to be distinguishable. A overview table with median values as well as a  
855 boxplot representation of scores is provided in supplementary material 1 Figure S5 and table  
856 S3. (Cardinal's smooth.image-function was used for better visibility. Unprocessed image can  
857 be found in supplementary material: 1 Figure S7)

858 Each sample is predominantly predicted in the correct diagnosis, achieving accuracies (pixel-  
859 based value) of 93% (ccRCC), 88% (RO), 88% (ChRCC). Winner of the classification is  
860 marked with a green bar for correct classification and a red bar for incorrect classification.

861

862 **Figure 4:** Unsupervised renal cancer subtype classification by microproteomics using rapid  
863 LC-MS/MS protein profiling. A) Heatmap and hierarchical clustering of differential relative  
864 protein abundances. Columns indicate samples and rows indicate proteins. The renal cancer  
865 subtype of the patient sample is indicated in colored bars on top. The graph shows the large  
866 similarities in protein expression profiles among patient samples with the same cancer  
867 subtype causing them to cluster together. Furthermore, hierarchical clustering of the protein  
868 abundances reveals protein cluster that are detected in a cancer subtype specific manner.  
869 Protein groups selected for subsequent network analysis are indicated by color blocks on the  
870 y-axis dendrogram (groups 1-4). The asterisk \* marks outlier patient from sample figure 3l.

871 B) Principal component analysis of the sample set. Dotted ellipses are such that with a  
872 probability of 95% a new observation from the same group will fall inside the area. The first  
873 (PC1) and second (PC2) component explain 17.6 % of the total variance whereas the other  
874 components lie at 7.7% and 4.4% respectively. There is a clear separation of ccRCC and RO  
875 samples already in the first two principal components. Differences between RO and ChRCC  
876 are subtle and are only evident when considering components that display lower variance  
877 (PC2:PC3 and PC3:PC4). The small group of the eight ChRCC-derived sarcomatoid renal

878 cancers samples cluster relatively far from the other ChRCC samples, thereby identifying  
879 these as clear “outliers” that require further attention.

880 **Figure 5:** Bioinformatics analysis (PantherDB) identified enriched biochemical functions in  
881 renal tumors. Protein groups were compared against a background of all the 2124 proteins  
882 identified in the experiment (blue) and against the background of the human genome (red).  
883 Fold enrichment (increase over expected value) as well as  $-\log$  of the false discovery rate  
884 (FDR) are shown.

885

886 **Figure 6:** Microproteomics and SVM model correctly classifies all renal tumor subtypes. A)  
887 Development of cross validation classification error rate in relation to increasing k-value  
888 (division of sample set in k groups. k-1 groups will be used for training and 1 group for  
889 testing). Results of 70% valid values using imputation of missing values (right) as well as  
890 100% valid values without imputation (left) are shown. Two classes of algorithms were  
891 compared: RBF and linear kernel. RBF performs slightly better than the linear kernel function  
892 with lower error rates. Values chosen for  $k \geq 3$ , error rates vary between 0% and 1.6% (2  
893 wrong prediction out of 117) for both tested kernel.

894 B) Radar plot of the cross-validated classification (k=5, kernel=RBF) of proteome profiles  
895 obtained from each extraction spot sample. Each sample is plotted equi-angular around the  
896 center. The pathological diagnosis (ground truth) for each sample at its angular position is  
897 indicated on the outside of the radar plot (all ccRCC samples: right, all ChRCC  
898 samples: bottom, all RO samples: right). A given sample is represented by 3 datapoints (dots)

899 plotted on a straight axis originating from the center. Each of the 3 datapoints represents the  
900 classification score for one of the 3 cancer types (scores for ccRCC: magenta, ChRCC:  
901 yellow, RO: blue). Scores range from lowest (center) to highest (outer circle). The highest  
902 score indicates highest likelihood for the respective cancer type. The plot shows that for all  
903 samples the cancer type with the highest score correlates with the respective pathological  
904 diagnosis, indicating the high accuracy of the classification. C) Feature optimization. The error  
905 rate for linear kernel and RBF are plotted over the number of ranked features (proteins).  
906 Decreasing feature number results in increase of false predictions. Minimum number of  
907 features for 0% error rate is at 30 for both RBF and linear kernel (list of ranked proteins can  
908 be found in supplementary material 10).

909

910 **Figure 7:** Combined use of MS imaging and rapid LC-MSMS microproteomics provides histo-  
911 molecular details of tumor heterogeneity. A) MSI based unsupervised clustering analysis of a  
912 RO patient sample. Two clusters (cluster 1 and cluster 2) are detected within the tumor area.  
913 Positions used for extraction of LC-MSMS samples are indicated by red circles extractions a-f  
914 (2 extractions for cluster 1, 4 extractions in cluster 2).

915 B) Volcano plot of LC-MSMS data derived ratio of protein abundance (Cluster 2 / Cluster1).  
916 The  $-\log p$  values of protein abundances are plotted over the difference of the protein  
917 abundance. The black line depicts the chosen significance threshold ( $p=0.01$ , 2-fold  
918 difference). Proteins above the thresholds are colored in blue and mark significant differences  
919 in protein abundance among the 2 compared regions. Proteins with increased abundance are



920 found on the right side of the plot, proteins with decreased abundance are found on the left  
921 side of the plot.

922 C) Heatmap display of the significantly different proteins from extraction spots a-f. On the x-  
923 axis extraction spots a-d and e-f group together by hierarchical clustering. The grouping is in  
924 correlation to the MSI clustering data. On the y axis two protein groups can be observed  
925 distinguishing the two x-axis-cluster. One group is upregulated in Cluster 1 the other group is  
926 upregulated in Cluster 2.

927 D) StringDB network analysis of upregulated proteins in MSI-Cluster-2 (top, sample: a-d) and  
928 upregulated proteins in MSI-Cluster 1 (bottom, sample: e-f). For a given set of proteins the  
929 string data base ([www.string-db.org](http://www.string-db.org)) provides information on a dataset in terms of protein  
930 attributes such as interaction, function or cellular occurrence. Proteins with higher abundance  
931 in Cluster 2 are mainly mitochondrial associated proteins whereas cluster 1 shows increase  
932 abundance of cytoskeletal protein binding proteins.

933
